# Supplementary material for: Deletion of IKZF1 and Prognosis in Acute Lymphoblastic Leukemia
Source: Atypon-hosted journal article supplement (doi:10.1056/nejmoa0808253), 2009-01-07
Supplement: nejm_mullighan_470sa1.pdf [file nejm_mullighan_470sa1.pdf]

## Supplementary Appendix

This appendix has been provided by the authors to give readers additional information about their work.

Supplement to: Mullighan CG, Su X, Zhang J, et al. Deletion of *IKZF1* and prognosis in acute lymphoblastic leukemia. *N Engl J Med* 2009;360. DOI: 10.1056/NEJMoa0808253.

## SUPPLEMENTARY APPENDIX

for

### DELETION OF *IKZF1* AND PROGNOSIS IN ACUTE LYMPHOBLASTIC LEUKEMIA

Charles G. Mullighan<sup>1</sup>, Xiaoping Su<sup>1</sup>, Jinghui Zhang<sup>8</sup>, Ina Radtke<sup>1</sup>, Letha A. A. Phillips<sup>1</sup>, Christopher B. Miller<sup>1</sup>, Jing Ma<sup>3</sup>, Wei Liu<sup>4</sup>, Cheng Cheng<sup>4</sup>, Brenda A. Schulman<sup>5,7</sup>, Richard C. Harvey<sup>12</sup>, I-Ming Chen<sup>12</sup>, Robert J. Clifford<sup>9</sup>, William L. Carroll<sup>13</sup>, Gregory Reaman<sup>14</sup>, W. Paul Bowman<sup>15</sup>, Meenakshi Devidas<sup>16</sup>, Daniela S. Gerhard<sup>10</sup>, Wenjian Yang<sup>2</sup>, Mary V. Relling<sup>2</sup>, Sheila A. Shurtleff<sup>1</sup>, Dario Campana<sup>1,6</sup>, Michael J. Borowitz<sup>17</sup>, Ching-Hon Pui<sup>6</sup>, Malcolm Smith<sup>11</sup>, Stephen P. Hunger<sup>18</sup>, Cheryl L. Willman<sup>12</sup>, James R. Downing<sup>1</sup>, and the Children's Oncology Group

<sup>1</sup>Pathology, <sup>2</sup>Pharmaceutical Sciences, <sup>3</sup>The Hartwell Center for Bioinformatics and Biotechnology, <sup>4</sup>Biostatistics, <sup>5</sup>Structural Biology and <sup>6</sup>Oncology, St Jude Children's Research Hospital, Memphis, TN; <sup>7</sup>Howard Hughes Medical Institute; <sup>8</sup>The Center for Biomedical Informatics and Information Technology, <sup>9</sup>Laboratory of Population Genetics; <sup>10</sup>Office of Cancer Genomics and <sup>11</sup>Cancer Therapy Evaluation Program, National Cancer Institute, National Institutes of Health; <sup>12</sup>University of New Mexico Cancer Research and Treatment Center, Albuquerque, NM; <sup>13</sup>New York University Cancer Institute, New York, NY; <sup>14</sup>Children's National Medical Center, Washington, DC; <sup>15</sup>Hematology Oncology, Cook Children's Medical Center, Fort Worth, TX; <sup>16</sup>Epidemiology and Health Policy Research, College of Medicine, University of Florida, Gainesville, FL; <sup>17</sup>Pathology, Johns Hopkins Medical Institute, Baltimore, MD; and <sup>18</sup>The University of Colorado Denver School of Medicine and The Children's Hospital, Aurora, CO; and the Children's Oncology Group.

## CONTENTS

|                                                                                     |           |
|-------------------------------------------------------------------------------------|-----------|
| <b>SUPPLEMENTARY METHODS</b> .....                                                  | <b>4</b>  |
| Patients and samples.....                                                           | 4         |
| Single nucleotide polymorphism microarray analyses.....                             | 5         |
| <i>PAX5</i> , <i>IKZF1</i> and <i>EBF1</i> resequencing and mutation detection..... | 6         |
| Structural modeling of <i>PAX5</i> mutations .....                                  | 7         |
| Analysis of associations between DNA copy number abnormalities and outcome .....    | 7         |
| Gene expression profiling of high risk ALL .....                                    | 9         |
| Genomic data access .....                                                           | 10        |
| <b>SUPPLEMENTARY RESULTS</b> .....                                                  | <b>23</b> |
| <b>REFERENCES</b> .....                                                             | <b>58</b> |

## SUPPLEMENTARY TABLES

|                                                                                                                                                                                                       |    |
|-------------------------------------------------------------------------------------------------------------------------------------------------------------------------------------------------------|----|
| Supplementary Table 1. Samples studied from the Children’s Oncology Group P9906 cohort ...                                                                                                            | 12 |
| Supplementary Table 2. 258 St Jude B-progenitor ALL cases examined. ....                                                                                                                              | 17 |
| Supplementary Table 3. DNA copy number abnormality frequency in high-risk pediatric<br>ALL.....                                                                                                       | 23 |
| Supplementary Table 4. Regions of recurring copy number alteration in the P9906 cohort.....                                                                                                           | 24 |
| Supplementary Table 5. Regions of recurring copy number alteration in the St Jude cohort. ....                                                                                                        | 27 |
| Supplementary Table 6. Results of <i>PAX5</i> genomic quantitative PCR.....                                                                                                                           | 29 |
| Supplementary Table 7. <i>PAX5</i> sequence mutations in the P9906 cohort. ....                                                                                                                       | 30 |
| Supplementary Table 8. Description all P9906 cases harboring <i>IKZF1</i> deletions and/or<br>sequence mutations, and results of genomic quantitative PCR results for <i>IKZF1</i><br>deletions. .... | 31 |
| Supplementary Table 9. Description of B-cell pathway lesions observed in the P9906 cohort. ....                                                                                                       | 33 |
| Supplementary Table 10. Variation in number of B cell pathway lesions between P9906 ALL<br>subtypes.....                                                                                              | 37 |
| Supplementary Table 11. Genes with univariate Cox score exceeding threshold of $\pm 1.8$ in<br>SPC analysis, P9906 cohort. ....                                                                       | 38 |
| Supplementary Table 12. Genes with univariate Cox score exceeding threshold of $\pm 1.9$ in<br>SPC analysis, St Jude cohort.....                                                                      | 39 |
| Supplementary Table 13. Associations between of B cell pathway lesions, <i>IKZF1</i> alterations<br>and hematologic relapse, P9906 cohort .....                                                       | 40 |
| Supplementary Table 14. Kaplan-Meier estimates of EFS by B cell pathway or <i>IKZF1</i><br>lesions, P9906 cohort.....                                                                                 | 41 |

|                                                                                                                                                                                                                                              |    |
|----------------------------------------------------------------------------------------------------------------------------------------------------------------------------------------------------------------------------------------------|----|
| Supplementary Table 15. Hazard ratio estimates of B-cell pathway and <i>IKZF1</i> lesions on relapse and event free survival, P9906 cohort. ....                                                                                             | 42 |
| Supplementary Table 16. Associations between genomic abnormalities and day 8 MRD, P9906 cohort. ....                                                                                                                                         | 43 |
| Supplementary Table 17. Associations between genetic lesions and day 29 MRD, P9906 cohort .....                                                                                                                                              | 44 |
| Supplementary Table 18. Association of genetic lesions with day 29 MRD adjusted by age, presentation leukocyte count and genetic subtype in the P9906 cohort. ....                                                                           | 45 |
| Supplementary Table 19. Multivariable analysis of associations between <i>IKZF1</i> deletion/mutation and outcome in the P9906 cohort adjusting for age, presentation leukocyte count, leukemia subtype, and day 8 or day 29 MRD level ..... | 46 |
| Supplementary Table 20. Cumulative incidence of isolated or combined hematologic relapse by genetic lesions, St Jude cohort with MRD data. ....                                                                                              | 47 |
| Supplementary Table 21. Cumulative incidence of hematologic relapse by genetic lesions, St Jude cohort with MRD data, excluding BCR-ABL1 positive ALL.....                                                                                   | 48 |
| Supplementary Table 22. Associations of genetic lesions and day 19 MRD, St Jude cohort (all B-progenitor ALL cases with MRD data) .....                                                                                                      | 49 |
| Supplementary Table 23. Associations of genetic lesions and day 46 MRD, St Jude cohort (all B-progenitor ALL cases with MRD data) .....                                                                                                      | 50 |
| Supplementary Table 24. Associations of genetic lesions and day 19 MRD, St Jude cohort (B-progenitor ALL cases, excluding <i>BCR-ABL1</i> ALL) .....                                                                                         | 51 |
| Supplementary Table 25. Associations of genetic lesions and day 46 MRD, St Jude cohort (B-progenitor ALL cases, excluding <i>BCR-ABL1</i> ALL) .....                                                                                         | 51 |
| Supplementary Table 26. Genes driving positive enrichment of hematopoietic stem/progenitor gene set in P9906 high-risk ALL.....                                                                                                              | 52 |
| Supplementary Table 27. Genes driving negative enrichment of the B-cell signal transduction gene set in P9906 high-risk ALL. ....                                                                                                            | 53 |

## **SUPPLEMENTARY FIGURES**

|                                                                                                                                                                 |    |
|-----------------------------------------------------------------------------------------------------------------------------------------------------------------|----|
| Supplementary Figure 1. <i>PAX5</i> deletions in P9906 ALL. ....                                                                                                | 54 |
| Supplementary Figure 2. <i>IKZF1</i> deletions in P9906 ALL.....                                                                                                | 55 |
| Supplementary Figure 3. Gene set enrichment analysis (GSEA) of poor outcome P9906 ALL, poor outcome St Jude ALL, and <i>BCR-ABL1</i> positive St Jude ALL. .... | 56 |

## SUPPLEMENTARY METHODS

### *Patients and samples*

The P9906 cohort comprised 221 B-progenitor ALL cases treated on the Children's Oncology Group P9906 study with an augmented intensive regimen of post-induction chemotherapy<sup>1</sup> (Supplementary Table 1). All patients were high risk based on the presence of central nervous system or testicular disease, *MLL* rearrangement, or based on age, gender and presentation leukocyte count<sup>2</sup>. *BCR-ABL1* and hypodiploid ALL, and cases of primary induction failure were excluded. Hyperdiploid (as defined by trisomy of chromosomes 4 and 10 on cytogenetic analysis) and *ETV6-RUNX1* cases were excluded unless CNS or testicular involvement was present at diagnosis. Of 276 cases enrolled, 271 were eligible, and 221 had suitable material for genomic analysis. Twenty-five (11.3%) cases were *TCF3-PBX1* positive, 19 harbored *MLL*-rearrangements, four were hyperdiploid, and three were *ETV6-RUNX1* positive. One hundred seventy (76.9%) lacked a recurring chromosomal abnormality. The clinical protocol was approved by the National Cancer Institute and by the Institutional Review Board at each of the Children's Oncology Group institutions. Patients and/or a parent/guardian provided written informed consent to participate in the clinical trial and for future research using clinical specimens. The validation cohort comprised 258 B-progenitor ALL cases treated at St Jude Children's Research Hospital<sup>3,4</sup>, and included 44 high hyperdiploid (greater than 50 chromosomes), 10 hypodiploid, 17 *TCF3-PBX1* positive, 50 *ETV6-RUNX1* positive, 21 *BCR-ABL1* positive and 24 *MLL* rearranged B-progenitor ALL cases, and 92 cases with low hyperdiploid, pseudodiploid, normal or miscellaneous karyotypes. These cases were treated on St Jude Total XI (N=8), XII (N=13), XIII (N=105), XIV (N=4), XV (N=114) and Interfant-99 (infant; N=5) protocols<sup>5-9</sup>. Nine cases were treated off protocol. The study was approved by the

St Jude Children's Research Hospital Institutional Review Board, and informed consent was obtained from patients and/or parents/guardians.

### ***Single nucleotide polymorphism microarray analyses***

Cases in the P9906 cohort were genotyped using 250K Sty and Nsp arrays (Affymetrix, Santa Clara, CA), which together examine over 500,000 genomic loci. Thirty-six cases from the St Jude cohort were genotyped using SNP 6.0 arrays (Affymetrix) which examine over 1.87 million loci; 37 with 250K Sty and Nsp arrays, and 185 with both 250K and two 50K arrays that together examine over 615,000 markers. SNP array data preprocessing and inference of DNA copy number abnormalities (CNA) and loss-of-heterozygosity (LOH) was performed as previously described<sup>3,4</sup>. Briefly, SNP calls were generated using the DM or Birdseed algorithms in GTYPE 4.0 or Genotyping Console (Affymetrix). Summarization of probe level data was performed using the PM/MM (50K and 250K arrays) or PM-only (SNP 6.0 arrays) model-based expression algorithms in dChip ([www.dchip.org](http://www.dchip.org))<sup>10</sup>. Normalization of array signals was performed using a reference normalization algorithm that utilizes only those SNP probes from diploid regions of each array to guide normalization<sup>3,11</sup>. To identify all tumor-acquired regions of CNA for each sample, circular binary segmentation (CBS)<sup>12</sup> (implemented as the DNACopy package in R) was performed by directly comparing each tumor sample to the corresponding remission sample.

To ensure data from the SNP 50k and 250k arrays (the annotations for which are based on the hg17 genome build) were comparable to data obtained from the SNP 6.0 arrays (based on the hg18 genome build), genome coordinates of the segments from the SNP 6.0 arrays were converted to the corresponding hg17 genome coordinates using the command line *liftOver* tool available from UCSC genome browser (<http://hgdownload.cse.ucsc.edu/admin/exe/>). Curated

CBS segments were then re-extrapolated into a genome-wide matrix of 615,000 probe-set features for all cases.

***PAX5, IKZF1 and EBF1 resequencing and mutation detection.***

Genomic resequencing of all coding exons of *PAX5*, *IKZF1* and *EBF1* was performed for 197 P9906 samples with available DNA and gene expression data by Agencourt Biosciences (Beverly, MA). Genomic DNA was amplified in 384 well plates, with each PCR reaction containing 10 ng DNA, 1X HotStar buffer, 0.8 mM dNTPs, 1 mM MgCl<sub>2</sub>, 0.2U HotStar enzyme (Qiagen) and 0.2 μM forward and reverse primers in 10 μl reaction volumes. PCR cycling parameters were: one cycle of 95°C for 15 min, 35 cycles of 95°C for 20s, 60°C for 30s and 72°C for 1 min, followed by one cycle of 72°C for 3 min. PCR products were purified using proprietary large scale automated template purification systems using solid-phase reversible immobilization, and then sequenced using dye-terminator chemistry and ABI 3700/3730 machines (Applied Biosystems, Foster City, CA). Base calls and quality scores were determined using the program PHRED<sup>13,14</sup>.

Sequence variations including substitutions and insertion/deletions (indel) were analyzed using the SNPdetector<sup>15</sup> and the IndelDetector<sup>16</sup> software. A useable read was required to have at least one 30-bp window in which 90% of the bases have PHRED quality score of at least 30. Poor quality reads were filtered prior to variation detection. The minimum threshold of secondary to primary peak ratio for substitution and indel detection was set to be 20% and 10%, respectively. All sequence variations were annotated using a previously developed variation annotation pipeline<sup>17</sup>. Any variation that did not match a known polymorphism (defined as a dbSNP record that does not belong to OMIM SNP nor COSMIC somatic variation database<sup>18,19</sup>) and resulted in a non-silent amino acid change was considered a putative mutation.

All putative sequence mutations were confirmed by repeat genomic PCR and sequencing of both tumor and remission DNA. Where possible, expression of mutated *PAX5* and *IKZF1* alleles was confirmed by amplification and direct sequencing of full length *PAX5* and *IKZF1* cDNA as previously described<sup>3,4</sup>. Transcripts were then cloned into pGEM-T-Easy (Promega, Madison, WI) and multiple colonies sequenced. Confirmation of CNA involving *PAX5* and *IKZF1* by genomic quantitative PCR was performed as previously described<sup>3,4</sup>.

### ***Structural modeling of PAX5 mutations***

Missense substitutions were generated in the *PAX5* (residues 1-149)/ETS-1(residues 331-440)/DNA structure<sup>20</sup> and subjected to local refinement using the program O<sup>21</sup>. Structural representation was performed with the program PyMOL (Delano Scientific)<sup>22</sup>.

### ***Analysis of associations between DNA copy number abnormalities and outcome***

Supervised principal components (SPC) analysis<sup>23,24</sup> was used to examine associations between CNA and outcome of therapy in a genome-wide fashion. This method has previously been used to examine associations between gene expression profiling data and outcome in cancer<sup>23</sup>. To implement the SPC method for analysis of CNA and outcome, regions of somatic CNA for each sample were transformed into a matrix in which each column represented an individual case, each row represented an individual gene, and each cell represented copy number status for each gene targeted by CNA in at least one case. Using the P9906 cohort as the training set, a modified univariate Cox score was calculated for the association between copy number status of each gene and event-free survival, and genes whose Cox score exceeded a threshold that best predicted survival were used to carry out supervised principal components analysis. To determine the Cox threshold, the training set was split and principal components were derived from one half of the samples, and then used in a Cox model to predict survival in the other half. By varying the

threshold of Cox scores and using twofold cross-validation, this process was repeated ten times, and a threshold of  $\pm 1.8$  (averaged over ten separate repeats of this procedure) was used to generate the principal components subsequently used to predict outcome.

For each case, we used the first principal component in a regression model to calculate a SPC risk score that represents the sum of the weighted copy number levels for each gene found to be significantly associated with prognosis. To validate the SPC predictor, we computed risk scores for each of the 258 cases in the St Jude validation cohort using the model developed in the P9906 training set, and tested whether these scores were correlated with survival. To illustrate the performance of the SPC risk score in predicting survival, cases in the validation cohort were classified as being high or low risk according to the calculated SPC risk score, and cumulative incidence of hematologic relapse and any relapse in each SPC risk group analyzed using Gray's test<sup>25</sup>. To examine the role of individual genes in determining outcome, we computed importance scores for genes with Cox scores exceeding the threshold defined by cross validation. The importance score is equivalent to the correlation between each gene and the first supervised principal component. Associations between genes with the top importance scores and hematologic and any relapse were then analyzed using Gray's test<sup>25</sup>. Event-free survival (EFS) was defined as the time from diagnosis until the date of failure (relapse, death, or second malignancy) or until the last follow-up date for all event-free survivors. Associations between genetic variables (deletions  $\pm$  sequence mutations of individual genes, presence and number B-cell pathway lesions) and EFS were estimated by the methods of Kaplan and Meier. Standard errors were calculated by the methods of Peto *et al.*<sup>26</sup>. The Mantel–Haenszel test was used to compare EFS estimates for patients with and without lesion at each locus<sup>27</sup>. The proportional hazards model of Fine and Gray was used to adjust for age, presentation leukocyte count,

cytogenetic subtype and levels of minimal residual disease (MRD)<sup>28</sup>. Analyses were performed using R (www.r-project.org)<sup>29</sup>, SAS (SAS v9.1.2, SAS Institute, Cary, NC) and SPLUS (SPLUS 7.0, Insightful Corp., Palo Alto, CA)

To evaluate associations between genetic alterations and MRD, MRD data was converted into an ordinal variable ( $<0.01\%$ ,  $0.01 \leq \text{MRD} < 1\%$ , and  $\geq 1\%$ ) and association analyses performed using the Chi-Square test (FREQ procedure, SAS) with estimation of false discovery rate (MULTTEST, SAS). Significantly associated variables were then adjusted for age, presentation leukocyte count and genetic subtype using logistic regression.

### ***Gene expression profiling of high risk ALL***

Gene expression profiling was performed using U133 Plus 2 microarrays (Affymetrix) for 197 P9906 samples, and using U133A microarrays (Affymetrix) for 175 St Jude samples. Probe intensities were generated using the MAS 5.0 algorithm, probe sets called absent in all samples in each cohort were excluded, and expression data log-transformed. To define the gene expression signature of poor outcome ALL in each cohort, we used *limma* (Linear Models for Microarray Analysis)<sup>30</sup>, the empirical Bayes t-test implemented in Bioconductor<sup>31</sup> and the Benjamini-Hochberg method of false discovery rate (FDR) estimation<sup>32</sup> to identify probe sets differentially expressed between cases defined as high or low risk according to their SPC risk score. This approach was also used to define the gene expression signature of *BCR-ABL1* positive *de novo* pediatric ALL in the St Jude cohort.

To assess similarity between the high-risk gene expression signatures of the P9906 and St Jude cohorts, and between the high-risk signatures and the signature of *BCR-ABL1* positive ALL, gene set enrichment analysis (GSEA)<sup>33</sup> and direct comparison of the signatures was performed.

Gene sets of the top up- and down-regulated genes in the signatures of high risk P9906 and St Jude ALL, and *BCR-ABL1* positive ALL were created and added to the collection of curated gene sets available at the Molecular Signatures Database (<http://www.broad.mit.edu/gsea/msigdb/>). GSEA of high risk ALL was then performed for each cohort using this expanded collection of gene sets. In a complementary approach, we determined the fraction of the top 100 differentially expressed probe sets in P9906 high-risk ALL that were also differentially expressed in St Jude *BCR-ABL1* positive ALL (at an FDR threshold of 5%). The Gene Set Analysis (GSA) algorithm, a modification of GSEA that allows testing of associations between gene sets and time-dependent variables such as survival time<sup>34</sup>, was used to examine associations between gene sets and EFS in the P9906 cohort.

### ***Genomic data access***

P9906 primary SNP and expression profile data, as well as the computed cancer-specific copy number alterations and sequence mutations, are available through the Childhood Cancer TARGET data portal (<http://target.cancer.gov/data/>). The TARGET Open-Access Data tier includes publicly accessible data that cannot be aggregated to generate a dataset unique to an individual using TARGET data and other publicly available data. The Open-Access Data tier does not require user certification for data access. This tier allows open access by researchers to all transcriptome data, mutations identified in the tumor tissue, as well as processed data describing cancer-specific copy number alterations and loss-of-heterozygosity described in detail below. The Controlled-Access Data tier contains broader clinical data and molecular signatures, which while stripped of direct identifiers, are individually unique. The Controlled-Access Data tier is for research projects related to target identification and therapeutics development for which the Open-Access data are not sufficient. Access to this tier requires user certification and

approval by the Data Access Committee responsible for the TARGET project, as described at the TARGET data portal site. P9906 gene expression data has also been deposited at the National Center for Biotechnology Information (NCBI) Gene Expression Omnibus (GEO)<sup>35,36</sup> (accession GSE11877). St Jude gene expression data has been deposited at GEO (accession GSE 12995). St Jude primary SNP array data is available to academic researchers from the authors upon request. All P9906 sequencing traces and sequencing primer information have been deposited with NCBI's trace archive. (<http://www.ncbi.nlm.nih.gov/Traces/trace.cgi?>).

**Supplementary Table 1. Samples studied from the Children’s Oncology Group P9906 cohort**

| <b>Sample ID</b> | <b>Group</b> | <b>U133 Plus 2 data</b> |
|------------------|--------------|-------------------------|
| 9906_001         |              | Yes                     |
| 9906_002         | TCF3-PBX1    | Yes                     |
| 9906_003         | TCF3-PBX1    | Yes                     |
| 9906_004         |              | Yes                     |
| 9906_005         |              | Yes                     |
| 9906_006         | MLL          | Yes                     |
| 9906_007         |              | Yes                     |
| 9906_008         |              | Yes                     |
| 9906_009         |              | Yes                     |
| 9906_010         |              |                         |
| 9906_011         |              |                         |
| 9906_012         |              | Yes                     |
| 9906_013         |              | Yes                     |
| 9906_014         |              |                         |
| 9906_016         |              |                         |
| 9906_017         | TCF3-PBX1    | Yes                     |
| 9906_018         |              | Yes                     |
| 9906_019         |              | Yes                     |
| 9906_020         |              | Yes                     |
| 9906_021         |              | Yes                     |
| 9906_022         |              | Yes                     |
| 9906_023         | MLL          | Yes                     |
| 9906_024         |              | Yes                     |
| 9906_027         |              | Yes                     |
| 9906_028         | TCF3-PBX1    | Yes                     |
| 9906_030         |              | Yes                     |
| 9906_031         |              | Yes                     |
| 9906_032         | MLL          | Yes                     |
| 9906_033         |              | Yes                     |
| 9906_034         |              | Yes                     |
| 9906_036         |              | Yes                     |
| 9906_037         |              | Yes                     |
| 9906_038         |              | Yes                     |
| 9906_039         |              | Yes                     |
| 9906_040         |              |                         |
| 9906_041         | MLL          | Yes                     |
| 9906_042         |              | Yes                     |
| 9906_043         | TCF3-PBX1    | Yes                     |
| 9906_045         |              | Yes                     |
| 9906_046         | TCF3-PBX1    | Yes                     |
| 9906_047         |              | Yes                     |
| 9906_048         |              | Yes                     |
| 9906_049         |              | Yes                     |
| 9906_050         |              | Yes                     |
| 9906_051         | MLL          | Yes                     |
| 9906_052         |              | Yes                     |

| <b>Sample ID</b> | <b>Group</b> | <b>U133 Plus 2 data</b> |
|------------------|--------------|-------------------------|
| 9906_055         |              | Yes                     |
| 9906_057         |              |                         |
| 9906_058         | TCF3-PBX1    | Yes                     |
| 9906_060         |              | Yes                     |
| 9906_061         |              | Yes                     |
| 9906_062         |              | Yes                     |
| 9906_063         | TCF3-PBX1    | Yes                     |
| 9906_064         |              | Yes                     |
| 9906_065         |              | Yes                     |
| 9906_066         |              | Yes                     |
| 9906_069         |              | Yes                     |
| 9906_070         |              |                         |
| 9906_071         | TCF3-PBX1    | Yes                     |
| 9906_073         |              | Yes                     |
| 9906_074         | MLL          | Yes                     |
| 9906_075         | TCF3-PBX1    |                         |
| 9906_076         |              | Yes                     |
| 9906_078         |              |                         |
| 9906_079         | TCF3-PBX1    | Yes                     |
| 9906_080         |              | Yes                     |
| 9906_082         |              | Yes                     |
| 9906_083         | ETV6-RUNX1   | Yes                     |
| 9906_084         |              | Yes                     |
| 9906_085         |              | Yes                     |
| 9906_086         |              | Yes                     |
| 9906_087         |              |                         |
| 9906_090         |              | Yes                     |
| 9906_092         |              | Yes                     |
| 9906_093         |              | Yes                     |
| 9906_094         |              | Yes                     |
| 9906_095         | MLL          | Yes                     |
| 9906_096         | TCF3-PBX1    | Yes                     |
| 9906_097         | MLL          | Yes                     |
| 9906_098         |              | Yes                     |
| 9906_099         |              | Yes                     |
| 9906_100         | TCF3-PBX1    |                         |
| 9906_101         |              | Yes                     |
| 9906_102         |              | Yes                     |
| 9906_106         |              | Yes                     |
| 9906_107         |              | Yes                     |
| 9906_108         |              | Yes                     |
| 9906_109         |              |                         |
| 9906_110         |              | Yes                     |
| 9906_111         |              | Yes                     |
| 9906_113         |              | Yes                     |
| 9906_114         |              | Yes                     |
| 9906_115         | MLL          | Yes                     |
| 9906_116         | MLL          | Yes                     |
| 9906_117         |              | Yes                     |

| <b>Sample ID</b> | <b>Group</b> | <b>U133 Plus 2 data</b> |
|------------------|--------------|-------------------------|
| 9906_118         |              | Yes                     |
| 9906_119         |              | Yes                     |
| 9906_120         |              | Yes                     |
| 9906_121         |              | Yes                     |
| 9906_122         | Hyperdiploid | Yes                     |
| 9906_123         | MLL          | Yes                     |
| 9906_124         |              | Yes                     |
| 9906_126         |              | Yes                     |
| 9906_128         |              | Yes                     |
| 9906_129         |              | Yes                     |
| 9906_132         |              | Yes                     |
| 9906_133         |              | Yes                     |
| 9906_135         |              | Yes                     |
| 9906_136         |              | Yes                     |
| 9906_137         | MLL          | Yes                     |
| 9906_138         |              | Yes                     |
| 9906_139         | MLL          | Yes                     |
| 9906_141         |              | Yes                     |
| 9906_142         | MLL          | Yes                     |
| 9906_143         |              | Yes                     |
| 9906_144         |              | Yes                     |
| 9906_145         |              | Yes                     |
| 9906_146         |              | Yes                     |
| 9906_147         |              | Yes                     |
| 9906_148         |              | Yes                     |
| 9906_149         |              |                         |
| 9906_150         |              | Yes                     |
| 9906_151         |              | Yes                     |
| 9906_152         | TCF3-PBX1    | Yes                     |
| 9906_153         |              | Yes                     |
| 9906_154         |              |                         |
| 9906_155         |              | Yes                     |
| 9906_156         | TCF3-PBX1    | Yes                     |
| 9906_157         |              | Yes                     |
| 9906_159         | TCF3-PBX1    | Yes                     |
| 9906_160         |              | Yes                     |
| 9906_161         |              | Yes                     |
| 9906_163         | TCF3-PBX1    | Yes                     |
| 9906_165         |              |                         |
| 9906_166         | TCF3-PBX1    | Yes                     |
| 9906_167         |              | Yes                     |
| 9906_168         |              | Yes                     |
| 9906_170         |              | Yes                     |
| 9906_171         | Hyperdiploid | Yes                     |
| 9906_173         |              | Yes                     |
| 9906_174         |              | Yes                     |
| 9906_175         |              | Yes                     |
| 9906_176         |              | Yes                     |
| 9906_177         |              | Yes                     |

| <b>Sample ID</b> | <b>Group</b> | <b>U133 Plus 2 data</b> |
|------------------|--------------|-------------------------|
| 9906_179         |              | Yes                     |
| 9906_180         |              | Yes                     |
| 9906_182         |              |                         |
| 9906_183         |              | Yes                     |
| 9906_184         |              | Yes                     |
| 9906_185         |              | Yes                     |
| 9906_186         |              | Yes                     |
| 9906_187         | TCF3-PBX1    | Yes                     |
| 9906_188         |              | Yes                     |
| 9906_189         |              | Yes                     |
| 9906_190         |              | Yes                     |
| 9906_192         |              | Yes                     |
| 9906_193         |              |                         |
| 9906_195         |              | Yes                     |
| 9906_196         |              | Yes                     |
| 9906_198         | TCF3-PBX1    | Yes                     |
| 9906_199         |              | Yes                     |
| 9906_202         | TCF3-PBX1    | Yes                     |
| 9906_203         | TCF3-PBX1    |                         |
| 9906_206         |              | Yes                     |
| 9906_207         |              | Yes                     |
| 9906_209         | Hyperdiploid | Yes                     |
| 9906_210         |              | Yes                     |
| 9906_211         |              |                         |
| 9906_214         |              | Yes                     |
| 9906_215         |              | Yes                     |
| 9906_216         |              | Yes                     |
| 9906_217         |              | Yes                     |
| 9906_218         | TCF3-PBX1    | Yes                     |
| 9906_219         |              | Yes                     |
| 9906_220         |              | Yes                     |
| 9906_221         |              | Yes                     |
| 9906_222         |              | Yes                     |
| 9906_224         | ETV6-RUNX1   | Yes                     |
| 9906_225         |              | Yes                     |
| 9906_227         | MLL          | Yes                     |
| 9906_228         |              | Yes                     |
| 9906_229         | MLL          | Yes                     |
| 9906_230         | MLL          | Yes                     |
| 9906_231         |              |                         |
| 9906_233         |              | Yes                     |
| 9906_234         |              | Yes                     |
| 9906_235         |              | Yes                     |
| 9906_236         | TCF3-PBX1    | Yes                     |
| 9906_238         |              | Yes                     |
| 9906_239         |              | Yes                     |
| 9906_240         |              | Yes                     |
| 9906_241         |              | Yes                     |
| 9906_242         |              | Yes                     |

| <b>Sample ID</b> | <b>Group</b> | <b>U133 Plus 2 data</b> |
|------------------|--------------|-------------------------|
| 9906_243         | ETV6-RUNX1   | Yes                     |
| 9906_244         |              | Yes                     |
| 9906_245         | Hyperdiploid | Yes                     |
| 9906_246         |              | Yes                     |
| 9906_247         | MLL          | Yes                     |
| 9906_248         |              | Yes                     |
| 9906_249         |              | Yes                     |
| 9906_250         |              |                         |
| 9906_251         |              | Yes                     |
| 9906_252         |              |                         |
| 9906_253         |              | Yes                     |
| 9906_254         |              | Yes                     |
| 9906_255         |              | Yes                     |
| 9906_256         |              | Yes                     |
| 9906_257         |              | Yes                     |
| 9906_258         |              | Yes                     |
| 9906_259         |              | Yes                     |
| 9906_260         |              | Yes                     |
| 9906_261         | MLL          | Yes                     |
| 9906_262         |              | Yes                     |
| 9906_263         |              | Yes                     |
| 9906_264         |              | Yes                     |
| 9906_265         |              | Yes                     |
| 9906_267         |              | Yes                     |
| 9906_268         |              |                         |
| 9906_269         |              |                         |
| 9906_271         |              | Yes                     |
| 9906_272         | TCF3-PBX1    | Yes                     |

**Supplementary Table 2. 258 St Jude B-progenitor ALL cases examined.**

\*250K/50K refers to cases examined with 250K Sty and 250K Nsp SNP microarrays; all but 37 cases were also examined with the 50K Hind 240 and 50K Xba 240 arrays.

| Sample ID           | SNP platform* | U133A expression chip |
|---------------------|---------------|-----------------------|
| Hyperdip>50-SNP-#01 | 250K/50K      | JD-ALD485-v5-U133A    |
| Hyperdip>50-SNP-#02 | 250K/50K      | JD0070-ALL-v5-U133A   |
| Hyperdip>50-SNP-#03 | 250K/50K      | JD-ALD510-v5-U133A    |
| Hyperdip>50-SNP-#04 | 250K/50K      | JD0017-ALL-v5-U133A   |
| Hyperdip>50-SNP-#05 | 250K/50K      | JD0020-ALL-v5-U133A   |
| Hyperdip>50-SNP-#06 | 250K/50K      | JD0023-ALL-v5-U133A   |
| Hyperdip>50-SNP-#07 | 250K/50K      | JD-ALD611-v5-U133A    |
| Hyperdip>50-SNP-#08 | 250K/50K      | JD-ALD612-v5-U133A    |
| Hyperdip>50-SNP-#09 | 250K/50K      | JD0041-ALL-v5-U133A   |
| Hyperdip>50-SNP-#10 | 250K/50K      | JD0077-ALL-v5-U133A   |
| Hyperdip>50-SNP-#11 | 250K/50K      | JD0111-ALL-v5-U133A   |
| Hyperdip>50-SNP-#12 | 250K/50K      | JD0097-ALL-v5-U133A   |
| Hyperdip>50-SNP-#13 | 250K/50K      | JD0117-ALL-v5-U133A   |
| Hyperdip>50-SNP-#14 | 250K/50K      | JD0120-ALL-v5-U133A   |
| Hyperdip>50-SNP-#15 | 250K/50K      | JD0121-ALL-v5-U133A   |
| Hyperdip>50-SNP-#16 | 250K/50K      | JD0127-ALL-v5-U133A   |
| Hyperdip>50-SNP-#17 | 250K/50K      | JD0151-ALL-v5-U133A   |
| Hyperdip>50-SNP-#18 | 250K/50K      | JD0168-B-ALL-v5-U133A |
| Hyperdip>50-SNP-#19 | 250K/50K      | JD0178-ALL-v5-U133A   |
| Hyperdip>50-SNP-#20 | 250K/50K      | JD0191-ALL-v5-U133A   |
| Hyperdip>50-SNP-#21 | 250K/50K      | JD0196-ALL-v5-U133A   |
| Hyperdip>50-SNP-#22 | 250K/50K      | JD0219-ALL-v5-U133A   |
| Hyperdip>50-SNP-#23 | 250K/50K      | JD0222-ALL-v5-U133A   |
| Hyperdip>50-SNP-#24 | 250K/50K      | JD-ALD085-v5-U133A    |
| Hyperdip>50-SNP-#25 | 250K/50K      |                       |
| Hyperdip>50-SNP-#26 | 250K/50K      |                       |
| Hyperdip>50-SNP-#27 | SNP 6.0       | JD-ALD013-v5-U133A    |
| Hyperdip>50-SNP-#28 | 250K/50K      |                       |
| Hyperdip>50-SNP-#29 | 250K/50K      | JD-ALD112-v5-U133A    |
| Hyperdip>50-SNP-#30 | 250K/50K      | JD-ALD163-v5-U133A    |
| Hyperdip>50-SNP-#31 | 250K/50K      |                       |
| Hyperdip>50-SNP-#32 | 250K/50K      |                       |
| Hyperdip>50-SNP-#33 | 250K/50K      |                       |
| Hyperdip>50-SNP-#34 | 250K/50K      |                       |
| Hyperdip>50-SNP-#35 | 250K/50K      |                       |
| Hyperdip>50-SNP-#36 | 250K/50K      |                       |
| Hyperdip>50-SNP-#37 | 250K/50K      |                       |
| Hyperdip>50-SNP-#38 | 250K/50K      |                       |
| Hyperdip>50-SNP-#39 | 250K/50K      |                       |
| Hyperdip50-SNP-#51  | SNP 6.0       |                       |
| Hyperdip50-SNP-#52  | SNP 6.0       |                       |
| Hyperdip50-SNP-#53  | SNP 6.0       |                       |

| Sample ID          | SNP platform* | U133A expression chip |
|--------------------|---------------|-----------------------|
| Hyperdip50-SNP-#54 | SNP 6.0       |                       |
| Hyperdip50-SNP-#55 | SNP 6.0       |                       |
| E2A-PBX1-SNP-#01   | 250K/50K      | JD0004-ALL-v5-U133A   |
| E2A-PBX1-SNP-#02   | 250K/50K      | JD0015-ALL-v5-U133A   |
| E2A-PBX1-SNP-#03   | 250K/50K      | JD0036-ALL-v5-U133A   |
| E2A-PBX1-SNP-#04   | 250K/50K      | JD0042-ALL-v5-U133A   |
| E2A-PBX1-SNP-#05   | 250K/50K      | JD0083-ALL-v5-U133A   |
| E2A-PBX1-SNP-#06   | 250K/50K      | JD0099-ALL-v5-U133A   |
| E2A-PBX1-SNP-#07   | 250K/50K      | JD0104-ALL-v5-U133A   |
| E2A-PBX1-SNP-#08   | 250K/50K      |                       |
| E2A-PBX1-SNP-#09   | 250K/50K      | JD0203-ALL-v5-U133A   |
| E2A-PBX1-SNP-#10   | 250K/50K      | JD-ALD019-v5-U133A    |
| E2A-PBX1-SNP-#11   | 250K/50K      | JD-ALD025-v5-U133A    |
| E2A-PBX1-SNP-#12   | SNP 6.0       | JD-ALD437-v5-U133A    |
| E2A-PBX1-SNP-#13   | 250K/50K      | JD-ALD034-v5-U133A    |
| E2A-PBX1-SNP-#14   | 250K/50K      | JD-ALD041-v5-U133A    |
| E2A-PBX1-SNP-#15   | 250K/50K      | JD-ALD071-v5-U133A    |
| E2A-PBX1-SNP-#16   | 250K/50K      | JD-ALD073-v5-U133A    |
| E2A-PBX1-SNP-#17   | 250K/50K      | JD-ALD079-v5-U133A    |
| TEL-AML1-SNP-#01   | 250K/50K      | JD0002-ALL-v5-U133A   |
| TEL-AML1-SNP-#02   | 250K/50K      | JD0066-ALL-v5-U133A   |
| TEL-AML1-SNP-#03   | 250K/50K      | JD0056-ALL-v5-U133A   |
| TEL-AML1-SNP-#04   | 250K/50K      | JD-ALD493-v5-U133A    |
| TEL-AML1-SNP-#05   | 250K/50K      | JD0058-ALL-v5-U133A   |
| TEL-AML1-SNP-#06   | 250K/50K      | JD0059-ALL-v5-U133A   |
| TEL-AML1-SNP-#07   | 250K/50K      | JD0005-ALL-v5-U133A   |
| TEL-AML1-SNP-#08   | 250K/50K      | JD0009-ALL-v5-U133A   |
| TEL-AML1-SNP-#09   | 250K/50K      | JD0033-ALL-v5-U133A   |
| TEL-AML1-SNP-#10   | 250K/50K      | JD0014-ALL-v5-U133A   |
| TEL-AML1-SNP-#11   | 250K/50K      | JD0016-ALL-v5-U133A   |
| TEL-AML1-SNP-#12   | 250K/50K      | JD0018-ALL-v5-U133A   |
| TEL-AML1-SNP-#13   | 250K/50K      | JD0048-ALL-v5-U133A   |
| TEL-AML1-SNP-#14   | 250K/50K      | JD0085-ALL-v5-U133A   |
| TEL-AML1-SNP-#15   | 250K/50K      | JD0101-ALL-v5-U133A   |
| TEL-AML1-SNP-#16   | 250K/50K      | JD0118-ALL-v5-U133A   |
| TEL-AML1-SNP-#17   | 250K/50K      | JD0107-ALL-v5-U133A   |
| TEL-AML1-SNP-#18   | 250K/50K      | JD0109-ALL-v5-U133A   |
| TEL-AML1-SNP-#19   | 250K/50K      | JD0123-ALL-v5-U133A   |
| TEL-AML1-SNP-#20   | 250K/50K      | JD0139-ALL-v5-U133A   |
| TEL-AML1-SNP-#21   | 250K/50K      | JD0149-ALL-v5-U133A   |
| TEL-AML1-SNP-#22   | 250K/50K      | JD0170-ALL-v5-U133A   |
| TEL-AML1-SNP-#23   | 250K/50K      |                       |
| TEL-AML1-SNP-#24   | 250K/50K      | JD0175-ALL-v5-U133A   |
| TEL-AML1-SNP-#25   | 250K/50K      | JD0193-ALL-v5-U133A   |
| TEL-AML1-SNP-#26   | 250K/50K      | JD0201-ALL-v5-U133A   |
| TEL-AML1-SNP-#27   | 250K/50K      |                       |
| TEL-AML1-SNP-#28   | 250K/50K      | JD0212-ALL-v5-U133A   |

| Sample ID        | SNP platform* | U133A expression chip |
|------------------|---------------|-----------------------|
| TEL-AML1-SNP-#29 | 250K/50K      | JD0221-ALL-v5-U133A   |
| TEL-AML1-SNP-#30 | 250K/50K      |                       |
| TEL-AML1-SNP-#31 | 250K/50K      | JD-ALD004-v5-U133A    |
| TEL-AML1-SNP-#32 | 250K/50K      | JD-ALD005-v5-U133A    |
| TEL-AML1-SNP-#33 | 250K/50K      | JD-ALD006-v5-U133A    |
| TEL-AML1-SNP-#34 | 250K/50K      | JD-ALD096-v5-U133A    |
| TEL-AML1-SNP-#35 | 250K/50K      |                       |
| TEL-AML1-SNP-#36 | 250K/50K      | JD-ALD108-v5-U133A    |
| TEL-AML1-SNP-#37 | 250K/50K      | JD-ALD109-v5-U133A    |
| TEL-AML1-SNP-#38 | 250K/50K      |                       |
| TEL-AML1-SNP-#39 | 250K/50K      |                       |
| TEL-AML1-SNP-#40 | 250K/50K      |                       |
| TEL-AML1-SNP-#41 | 250K/50K      |                       |
| TEL-AML1-SNP-#42 | 250K/50K      |                       |
| TEL-AML1-SNP-#43 | 250K/50K      |                       |
| TEL-AML1-SNP-#44 | 250K/50K      | JD-ALD054-v5-U133A    |
| TEL-AML1-SNP-#45 | 250K/50K      |                       |
| TEL-AML1-SNP-#46 | 250K/50K      |                       |
| TEL-AML1-SNP-#47 | 250K/50K      |                       |
| TEL-AML1-SNP-#48 | SNP 6.0       |                       |
| TEL-AML1-SNP-#49 | SNP 6.0       |                       |
| TEL-AML1-SNP-#50 | SNP 6.0       |                       |
| MLL-SNP-#01      | 250K/50K      | JD0080-ALL-v5-U133A   |
| MLL-SNP-#02      | 250K/50K      | JD0084-ALL-v5-U133A   |
| MLL-SNP-#03      | 250K/50K      |                       |
| MLL-SNP-#04      | 250K/50K      | JD0124-ALL-v5-U133A   |
| MLL-SNP-#05      | 250K/50K      | JD-ALD009-v5-U133A    |
| MLL-SNP-#06      | 250K/50K      | JD-ALD433-v5-U133A    |
| MLL-SNP-#07      | 250K/50K      | JD-ALD180-v5-U133A    |
| MLL-SNP-#08      | 250K/50K      | JD-ALD057-v5-U133A    |
| MLL-SNP-#09      | 250K/50K      | JD-ALD052-v5-U133A    |
| MLL-SNP-#10      | 250K/50K      | JD-ALD294-v5-U133A    |
| MLL-SNP-#11      | 250K/50K      | JD-ALD078-v5-U133A    |
| MLL-SNP-#12      | 250K/50K      |                       |
| MLL-SNP-#13      | 250K/50K      |                       |
| MLL-SNP-#15      | 250K/50K      |                       |
| MLL-SNP-#16      | 250K/50K      |                       |
| MLL-SNP-#17      | 250K/50K      | JD0284-ALL-v5-U133A   |
| MLL-SNP-#18      | 250K/50K      | JD-ALD232-v5-U133A    |
| MLL-SNP-#19      | 250K/50K      |                       |
| MLL-SNP-#20      | 250K/50K      |                       |
| MLL-SNP-#21      | 250K/50K      |                       |
| MLL-SNP-#22      | 250K/50K      |                       |
| MLL-SNP-#23      | 250K/50K      | JD-ALD385-v5-U133A    |
| MLL-SNP-#24      | SNP 6.0       |                       |
| MLL-SNP-#25      | SNP 6.0       |                       |
| BCR-ABL-SNP-#01  | 250K/50K      | JD-ALD494-v5-U133A    |

| Sample ID             | SNP platform* | U133A expression chip |
|-----------------------|---------------|-----------------------|
| BCR-ABL-SNP-#02       | 250K/50K      | JD-ALD613-v5-U133A    |
| BCR-ABL-SNP-#03       | 250K/50K      | JD0102-ALL-v5-U133A   |
| BCR-ABL-SNP-#04       | 250K/50K      | JD0129-ALL-v5-U133A   |
| BCR-ABL-SNP-#05       | 250K/50K      | JD0154-ALL-v5-U133A   |
| BCR-ABL-SNP-#06       | 250K/50K      | JD0192-ALL-v5-U133A   |
| BCR-ABL-SNP-#07       | 250K/50K      | JD0206-ALL-v5-U133A   |
| BCR-ABL-SNP-#08       | 250K/50K      | JD-ALD008-v5-U133A    |
| BCR-ABL-SNP-#09       | 250K/50K      | JD-ALD035-v5-U133A    |
| BCR-ABL-SNP-#10       | 250K/50K      | JD-ALD386-v5-U133A    |
| BCR-ABL-SNP-#11       | SNP 6.0       | JD-ALD387-v5-U133A    |
| BCR-ABL-SNP-#12       | 250K/50K      | JD-ALD388-v5-U133A    |
| BCR-ABL-SNP-#13       | 250K/50K      | JD-ALD389-v5-U133A    |
| BCR-ABL-SNP-#14       | 250K/50K      | JD-ALD390-v5-U133A    |
| BCR-ABL-SNP-#15       | SNP 6.0       | JD-ALD233-v5-U133A    |
| BCR-ABL-SNP-#16       | SNP 6.0       |                       |
| BCR-ABL-SNP-#17       | 250K/50K      | JD-ALD428-v5-U133A    |
| BCR-ABL-SNP-#18       | SNP 6.0       | JD-ALD264-v5-U133A    |
| BCR-ABL-SNP-#19       | 250K/50K      | JD-ALD171-v5-U133A    |
| BCR-ABL-SNP-#20       | 250K/50K      | JD-ALD039-v5-U133A    |
| BCR-ABL-SNP-#21       | 250K/50K      | JD-ALD391-v5-U133A    |
| Hypodip-SNP-#01       | 250K/50K      | JD0057-ALL-v5-U133A   |
| Hypodip-SNP-#02       | 250K/50K      | JD-ALD536-v5-U133A    |
| Hypodip-SNP-#03       | 250K/50K      | JD0025-ALL-v5-U133A   |
| Hypodip-SNP-#04       | 250K/50K      | JD0037-ALL-v5-U133A   |
| Hypodip-SNP-#05       | 250K/50K      | JD0087-ALL-v5-U133A   |
| Hypodip-SNP-#06       | 250K/50K      | JD0095-ALL-v5-U133A   |
| Hypodip-SNP-#07       | 250K/50K      |                       |
| Hypodip-SNP-#08       | 250K/50K      |                       |
| Hypodip-SNP-#09       | 250K/50K      | JD-ALD196-v5-U133A    |
| Hypodip-SNP-#10       | 250K/50K      |                       |
| Hyperdip>50-SNP-#40   | 250K/50K      | JD-ALD280-v5-U133A    |
| Hyperdip47-50-SNP-#01 | 250K/50K      | JD0064-ALL-v5-U133A   |
| Hyperdip47-50-SNP-#02 | 250K/50K      | JD-ALD509-v5-U133A    |
| Hyperdip47-50-SNP-#03 | 250K/50K      | JD0062-ALL-v5-U133A   |
| Hyperdip47-50-SNP-#04 | SNP 6.0       | JD-ALD554-v5-U133A    |
| Hyperdip47-50-SNP-#05 | 250K/50K      | JD0098-ALL-v5-U133A   |
| Hyperdip47-50-SNP-#06 | 250K/50K      | JD0112-ALL-v5-U133A   |
| Hyperdip47-50-SNP-#07 | 250K/50K      | JD0108-ALL-v5-U133A   |
| Hyperdip47-50-SNP-#08 | 250K/50K      | JD0132-ALL-v5-U133A   |
| Hyperdip47-50-SNP-#09 | 250K/50K      | JD0133-ALL-v5-U133A   |
| Hyperdip47-50-SNP-#10 | 250K/50K      | JD0137-ALL-v5-U133A   |
| Hyperdip47-50-SNP-#11 | 250K/50K      | JD0138-ALL-v5-U133A   |
| Hyperdip47-50-SNP-#12 | 250K/50K      | JD0150-ALL-v5-U133A   |
| Hyperdip47-50-SNP-#13 | 250K/50K      | JD0157-ALL-v5-U133A   |
| Hyperdip47-50-SNP-#14 | 250K/50K      | JD0181-ALL-v5-U133A   |
| Hyperdip47-50-SNP-#15 | 250K/50K      | JD0186B-ALL-v5-U133A  |
| Hyperdip47-50-SNP-#16 | 250K/50K      |                       |

| Sample ID             | SNP platform* | U133A expression chip |
|-----------------------|---------------|-----------------------|
| Hyperdip47-50-SNP-#17 | 250K/50K      |                       |
| Hyperdip47-50-SNP-#18 | 250K/50K      |                       |
| Hyperdip47-50-SNP-#19 | 250K/50K      |                       |
| Hyperdip47-50-SNP-#20 | 250K/50K      |                       |
| Hyperdip47-50-SNP-#21 | 250K/50K      |                       |
| Hyperdip47-50-SNP-#22 | 250K/50K      |                       |
| Hyperdip47-50-SNP-#23 | 250K/50K      |                       |
| Hyperdip47-50-SNP-#24 | 250K/50K      | JD-ALD242-v5-U133A    |
| Other-SNP-#01         | 250K/50K      | JD0065-ALL-v5-U133A   |
| Other-SNP-#02         | 250K/50K      | JD0116-ALL-v5-U133A   |
| Other-SNP-#03         | 250K/50K      | JD0122-ALL-v5-U133A   |
| Other-SNP-#04         | 250K/50K      | JD0131-ALL-v5-U133A   |
| Other-SNP-#05         | 250K/50K      | JD0166-ALL-v5-U133A   |
| Other-SNP-#06         | 250K/50K      | JD0202-ALL-v5-U133A   |
| Other-SNP-#07         | 250K/50K      | JD0226-ALL-v5-U133A   |
| Other-SNP-#08         | 250K/50K      | JD-ALD340-v5-U133A    |
| Other-SNP-#09         | 250K/50K      | JD-ALD363-v5-U133A    |
| Other-SNP-#10         | 250K/50K      |                       |
| Other-SNP-#11         | 250K/50K      |                       |
| Other-SNP-#12         | 250K/50K      | JD-ALD279-v5-U133A    |
| Other-SNP-#13         | 250K/50K      |                       |
| Other-SNP-#14         | 250K/50K      | JD-ALD194-v5-U133A    |
| Other-SNP-#15         | 250K/50K      | JD-ALD066-v5-U133A    |
| Other-SNP-#16         | 250K/50K      |                       |
| Other-SNP-#17         | 250K/50K      | JD-ALD329-v5-U133A    |
| Other-SNP-#18         | 250K/50K      | JD-ALD115-v5-U133A    |
| Other-SNP-#19         | 250K/50K      | JD-ALD185-v5-U133A    |
| Other-SNP-#20         | 250K/50K      | JD-ALD297-v5-U133A    |
| Other-SNP-#21         | SNP 6.0       | JD0021-ARD-v5-U133A   |
| Other-SNP-#22         | 250K/50K      | JD0031-ARD-v5-U133A   |
| Other-SNP-#23         | 250K/50K      | JD0025-ARD-v5-U133A   |
| Other-SNP-#24         | 250K/50K      | JD0003-ARD-v5-U133A   |
| Other-SNP-#25         | 250K/50K      | JD0018-ARD-v5-U133A   |
| Other-SNP-#26         | 250K/50K      | JD0014-ARD-v5-U133A   |
| Other-SNP-#27         | SNP 6.0       |                       |
| Other-SNP-#28         | SNP 6.0       |                       |
| Other-SNP-#29         | SNP 6.0       |                       |
| Other-SNP-#30         | SNP 6.0       |                       |
| Other-SNP-#31         | SNP 6.0       |                       |
| Other-SNP-#32         | SNP 6.0       |                       |
| Other-SNP-#33         | SNP 6.0       |                       |
| Other-SNP-#34         | SNP 6.0       |                       |
| Other-SNP-#35         | SNP 6.0       |                       |
| Other-SNP-#36         | SNP 6.0       |                       |
| Other-SNP-#37         | SNP 6.0       | JD-ALD146-v5-U133A    |
| Other-SNP-#38         | SNP 6.0       | JD-ALD420-v5-U133A    |
| Other-SNP-#39         | SNP 6.0       |                       |

| Sample ID         | SNP platform* | U133A expression chip |
|-------------------|---------------|-----------------------|
| Other-SNP-#40     | SNP 6.0       |                       |
| Other-SNP-#41     | SNP 6.0       |                       |
| Other-SNP-#42     | SNP 6.0       | JD0019-ALL-v5-U133A   |
| Other-SNP-#43     | SNP 6.0       |                       |
| Pseudodip-SNP-#01 | 250K/50K      | JD0001-ALL-v5-U133A   |
| Pseudodip-SNP-#02 | 250K/50K      | JD0071-ALL-v5-U133A   |
| Pseudodip-SNP-#03 | 250K/50K      | JD0012-ALL-v5-U133A   |
| Pseudodip-SNP-#04 | 250K/50K      | JD0032-ALL-v5-U133A   |
| Pseudodip-SNP-#05 | 250K/50K      | JD0021-ALL-v5-U133A   |
| Pseudodip-SNP-#06 | 250K/50K      | JD-ALD610-v5-U133A    |
| Pseudodip-SNP-#07 | 250K/50K      | JD0103-ALL-v5-U133A   |
| Pseudodip-SNP-#08 | 250K/50K      |                       |
| Pseudodip-SNP-#09 | 250K/50K      | JD0173-ALL-v5-U133A   |
| Pseudodip-SNP-#10 | 250K/50K      | JD0185B-ALL-v5-U133A  |
| Pseudodip-SNP-#11 | 250K/50K      | JD0188-ALL-v5-U133A   |
| Pseudodip-SNP-#12 | 250K/50K      | JD0225-ALL-v5-U133A   |
| Pseudodip-SNP-#13 | 250K/50K      |                       |
| Pseudodip-SNP-#14 | 250K/50K      |                       |
| Pseudodip-SNP-#15 | 250K/50K      |                       |
| Pseudodip-SNP-#16 | 250K/50K      | JD-ALD164-v5-U133A    |
| Pseudodip-SNP-#17 | 250K/50K      |                       |
| Pseudodip-SNP-#18 | SNP 6.0       |                       |
| Pseudodip-SNP-#19 | 250K/50K      |                       |
| Pseudodip-SNP-#20 | 250K/50K      |                       |
| Pseudodip-SNP-#21 | 250K/50K      | JD-ALD176-v5-U133A    |
| Pseudodip-SNP-#22 | 250K/50K      | JD0088-ALL-v5-U133A   |
| Pseudodip-SNP-#23 | 250K/50K      | JD-ALD136-v5-U133A    |
| Pseudodip-SNP-#24 | 250K/50K      | JD-ALD325-v5-U133A    |

## SUPPLEMENTARY RESULTS

**Supplementary Table 3. DNA copy number abnormality frequency in high-risk pediatric ALL**

| Group                          | All lesions |        |       | Deletions |        |       | Gains   |        |       |
|--------------------------------|-------------|--------|-------|-----------|--------|-------|---------|--------|-------|
|                                | Mean        | Median | Range | Mean      | Median | Range | Mean    | Median | Range |
| <i>ETV6-RUNX1</i><br>N=3       | 9.00        | 10     | 1-16  | 8.67      | 9      | 1-16  | .67     | 0      | 0-2   |
| <i>TCF3-PBX1</i><br>N=25       | 3.52        | 4      | 0-9   | 2.44      | 2      | 0-8   | 1.08    | 1      | 0-4   |
| <i>MLL</i> -rearranged<br>N=19 | 1.84        | 1      | 0-11  | 1.26      | 1      | 0-10  | .58     | 0      | 0-2   |
| High hyperdiploid<br>N=4       | 16.5        | 16.5   | 6-27  | 2.0       | 2      | 0-4   | 14.5    | 14.5   | 0-23  |
| Other<br>N=170                 | 9.59        | 7      | 0-86  | 5.84      | 5      | 0-33  | 3.78    | 1      | 0-75  |
| Total<br>N=221                 | 8.36        | 6      | 0-86  | 5.03      | 4      | 0-33  | 3.35    | 1      | 0-75  |
| <i>P</i>                       | <0.0001     |        |       | <0.0001   |        |       | <0.0001 |        |       |

**Supplementary Table 4. Regions of recurring copy number alteration in the P9906 cohort.**

Abnormalities are deletions unless otherwise indicated. \*Adjacent to gene. \*\*Deletion or gain \*\*\*Focal amplifications only. †Focal deletions and amplifications. ††Includes focal deletions, broad Xp deletions, and CNA immediately adjacent to the minimal region of focal deletion. †††B cell pathway lesions include deletions or sequence mutations involving *BCL11A* (N=1), *BLNK* (N=2), *EBF1* (N=17), *IKZF1* (N=67), *IKZF2* (N=1), *LEF1* (N=1), *MEF2C* (N=1), *PAX5* (N=81), *RAG1/2* (N=8), *SOX4* (N=1), *SPI1* (N=1) and *TCF3* (N=21); no lesions were found in *CD79A*, *GABPA*, *IKZF3*, *IL7RA*, *IRF4*, *IRF8*, *STAT3*, *STAT5A*, or *STAT5B*. *VPREB1* may be considered part of the “B cell pathway” but is located in the immunoglobulin lambda light chain locus at 22q11.22, and is commonly deleted upon rearrangement of this locus. Consequently the biologic significance of *VPREB1* deletions in B-ALL is unclear. Accordingly, the frequency of B cell pathway lesions is shown excluding and including *VPREB1* alterations. iAmp21, intrachromosomal amplification of chromosome 21.

| Lesion             | Location     | All | %    | Hyperdiploid | %  | TCF3-PBX1 | %  | ETV6-RUNX1 | %    | MLL | % | Other | %   |
|--------------------|--------------|-----|------|--------------|----|-----------|----|------------|------|-----|---|-------|-----|
|                    |              | 221 |      | 4            |    | 25        |    | 3          |      | 19  |   | 170   |     |
| <i>PDE4B</i>       | 1p31.2       | 6   | 2.7  | 0            | 0  | 0         | 0  | 0          | 0    | 0   | 0 | 6     | 3.5 |
| <i>NRAS</i>        | 1p13.1       | 4   | 1.8  | 0            | 0  | 0         | 0  | 0          | 0    | 0   | 0 | 4     | 2.4 |
| <i>ADAR</i>        | 1q22         | 4   | 1.8  | 0            | 0  | 0         | 0  | 0          | 0    | 0   | 0 | 4     | 2.4 |
| <i>ZNF528*</i>     | 1q44         | 6   | 2.7  | 0            | 0  | 0         | 0  | 0          | 0    | 0   | 0 | 6     | 3.5 |
| 1q gain            | 1q23.3-1qtel | 22  | 10.0 | 1            | 25 | 16        | 64 | 0          | 0    | 0   | 0 | 5     | 2.9 |
| <i>ARPP-21</i>     | 3p22.3       | 7   | 3.2  | 0            | 0  | 0         | 0  | 0          | 0    | 0   | 0 | 7     | 4.1 |
| <i>FHIT</i>        | 3p14.2       | 1   | 0.5  | 0            | 0  | 0         | 0  | 0          | 0    | 0   | 0 | 1     | 0.6 |
| <i>FLNB</i>        | 3p14.3       | 5   | 2.3  | 0            | 0  | 0         | 0  | 0          | 0    | 0   | 0 | 5     | 2.9 |
| <i>BTLA/CD200</i>  | 3q13.2       | 13  | 5.9  | 0            | 0  | 0         | 0  | 0          | 0    | 0   | 0 | 13    | 7.6 |
| <i>MBNL1</i>       | 3q25.1       | 8   | 3.6  | 0            | 0  | 0         | 0  | 1          | 33.3 | 0   | 0 | 7     | 4.1 |
| <i>TBL1XR1</i>     | 3q26.32      | 7   | 3.2  | 0            | 0  | 0         | 0  | 0          | 0    | 0   | 0 | 7     | 4.1 |
| <i>IL1RAP</i>      | 3q28         | 3   | 1.4  | 0            | 0  | 0         | 0  | 0          | 0    | 0   | 0 | 3     | 1.8 |
| <i>ARHGAP24*</i>   | 4q21.23      | 4   | 1.8  | 0            | 0  | 0         | 0  | 0          | 0    | 0   | 0 | 4     | 2.4 |
| <i>NR3C2*</i>      | 4q31.23      | 5   | 2.3  | 0            | 0  | 0         | 0  | 2          | 66.7 | 0   | 0 | 3     | 1.8 |
| <i>FBXW7</i>       | 4q31.3       | 3   | 1.4  | 0            | 0  | 0         | 0  | 0          | 0    | 0   | 0 | 3     | 1.8 |
| <i>EBF1</i>        | 5q33.3       | 17  | 7.7  | 0            | 0  | 0         | 0  | 1          | 33.3 | 0   | 0 | 16    | 9.4 |
| Histone cluster    | 6p22.2       | 9   | 4.0  | 0            | 0  | 0         | 0  | 1          | 33.3 | 0   | 0 | 8     | 4.7 |
| <i>GRIK2</i>       | 6q16         | 14  | 6.3  | 0            | 0  | 2         | 8  | 1          | 33.3 | 0   | 0 | 11    | 6.5 |
| <i>ARMC2/SESNI</i> | 6q21         | 15  | 6.8  | 0            | 0  | 2         | 8  | 1          | 33.3 | 0   | 0 | 12    | 7.1 |
| <i>ARID1B*</i>     | 6q25.3       | 8   | 3.6  | 0            | 0  | 1         | 4  | 1          | 33.3 | 0   | 0 | 6     | 3.5 |

| Lesion                                   | Location      | All | %    | Hyperdiploid | %  | TCF3-<br>PBX1 | %  | ETV6-<br>RUNX1 | %    | MLL | %    | Other | %    |
|------------------------------------------|---------------|-----|------|--------------|----|---------------|----|----------------|------|-----|------|-------|------|
|                                          |               | 221 |      | 4            |    | 25            |    | 3              |      | 19  |      | 170   |      |
| <i>IKZF1</i>                             | 7p13          | 63  | 28.6 | 0            | 0  | 0             | 0  | 0              | 0    | 1   | 5.3  | 61    | 35.9 |
| <i>IKZF1</i> CNA or<br>sequence mutation | 7p13          | 67  | 30.3 | 0            | 0  | 0             | 0  | 0              | 0    | 2   | 10.5 | 65    | 38.2 |
| <i>MSRA</i>                              | 8p23          | 4   | 1.8  | 0            | 0  | 0             | 0  | 0              | 0    | 0   | 0    | 4     | 2.4  |
| <i>TOX</i>                               | 8q12.1        | 8   | 3.6  | 0            | 0  | 0             | 0  | 1              | 33.3 | 0   | 0    | 7     | 4.1  |
| <i>CCDC26</i> **                         | 8q24.21       | 23  | 10.4 | 2            | 50 | 3             | 12 | 0              | 0    | 2   | 10.5 | 16    | 9.4  |
| <i>CDKN2A/B</i>                          | 9p21.3        | 101 | 45.7 | 2            | 50 | 9             | 38 | 1              | 33.3 | 4   | 21.1 | 85    | 50   |
| <i>PAX5</i> CNA                          | 9p13.2        | 70  | 31.7 | 1            | 25 | 10            | 40 | 1              | 33.3 | 1   | 5.3  | 57    | 33.5 |
| <i>PAX5</i> CNA or<br>sequence mutation  | 9p13.2        | 81  | 36.7 | 1            | 25 | 11            | 44 | 1              | 33.3 | 1   | 5.3  | 67    | 39.4 |
| <i>ABL1</i> ***                          | 9q34.13       | 3   | 1.4  | 0            | 0  | 0             | 0  | 0              | 0    | 0   | 0    | 3     | 1.8  |
| <i>ADARB2</i>                            | 10p15.2       | 4   | 1.8  | 0            | 0  | 0             | 0  | 0              | 0    | 0   | 0    | 4     | 2.4  |
| <i>COPEB/KLF6</i>                        | 10p15         | 2   | 0.9  | 0            | 0  | 0             | 0  | 0              | 0    | 0   | 0    | 2     | 1.17 |
| <i>ADD3</i>                              | 10q25.2       | 18  | 8.1  | 0            | 0  | 1             | 4  | 1              | 33.3 | 0   | 0    | 16    | 9.4  |
| <i>RAG1/2</i>                            | 11p12         | 8   | 3.6  | 0            | 0  | 0             | 0  | 0              | 0    | 1   | 5.3  | 7     | 4.1  |
| <i>NUP160/PTPRJ</i>                      | 11p11.2       | 4   | 1.8  | 0            | 0  | 0             | 0  | 0              | 0    | 0   | 0    | 4     | 2.4  |
| <i>ETV6</i>                              | 12p13.2       | 28  | 12.7 | 0            | 0  | 0             | 0  | 1              | 33.3 | 0   | 0    | 27    | 15.8 |
| <i>KRAS</i>                              | 12p12.1       | 14  | 6.3  | 0            | 0  | 2             | 8  | 0              | 0    | 1   | 5.3  | 11    | 6.5  |
| <i>BTG1</i>                              | 12q21.33      | 23  | 10.4 | 0            | 0  | 0             | 0  | 0              | 0    | 0   | 0    | 23    | 13.5 |
| <i>ZMYM5</i>                             | 13q12.11      | 3   | 1.4  | 0            | 0  | 0             | 0  | 0              | 0    | 0   | 0    | 3     | 1.8  |
| <i>ELF1</i>                              | 13q14.11      |     |      |              |    |               |    |                |      |     |      |       |      |
| <i>C13orf21/TSC22D1</i>                  | 13q14         | 20  | 9.1  | 0            | 0  | 5             | 20 | 0              | 0    | 0   | 0    | 15    | 8.8  |
| <i>RBI</i>                               | 13q14.2       | 25  | 11.3 | 0            | 0  | 5             | 20 | 0              | 0    | 0   | 0    | 20    | 11.8 |
| <i>DLEU2/7/mir15/-<br/>16a)</i>          | 13q14         | 21  | 9.5  | 0            | 0  | 5             | 20 | 0              | 0    | 0   | 0    | 16    | 9.4  |
| <i>ATP10A</i>                            | 15q12         | 6   | 2.7  | 0            | 0  | 0             | 0  | 0              | 0    | 0   | 0    | 6     | 3.5  |
| <i>SPRED1 (5')</i>                       | 15q14         | 0   | 0    | 0            | 0  | 0             | 0  | 0              | 0    | 0   | 0    | 0     | 0    |
| <i>LTK</i>                               | 15q15.1       | 0   | 0    | 0            | 0  | 0             | 0  | 0              | 0    | 0   | 0    | 0     | 0    |
| <i>NFI</i> <sup>†</sup>                  | 17q11.2       | 6   | 2.7  | 0            | 0  | 1             | 4  | 0              | 0    | 1   | 5.3  | 4     | 2.3  |
| <i>TCF3</i>                              | 19p13.3       | 21  | 9.5  | 0            | 0  | 15            | 60 | 0              | 0    | 0   | 0    | 6     | 3.5  |
| <i>C20orf94</i>                          | 20p12.2       | 19  | 8.6  | 0            | 0  | 0             | 0  | 0              | 0    | 0   | 0    | 19    | 11.2 |
| <i>ERG</i>                               | 21q22         | 11  | 5    | 0            | 0  | 0             | 0  | 0              | 0    | 0   | 0    | 11    | 6.5  |
| iAmp21                                   | 21,<br>varies | 10  | 4.5  | 0            | 0  | 0             | 0  | 0              | 0    | 0   | 0    | 10    | 5.8  |
| <i>VPREB1</i>                            | 22q11.22      | 57  | 25.8 | 0            | 0  | 0             | 0  | 2              | 66.7 | 0   | 0    | 55    | 32.4 |
| <i>IL3RA/CSF2RA</i> <sup>††</sup>        | Xp22.33       | 18  | 6.8  | 0            | 0  | 0             | 0  | 0              | 0    | 0   | 0    | 18    | 10.6 |

| Lesion                                                | Location | All       | %    | Hyperdiploid | %  | TCF3-<br>PBX1 | %    | ETV6-<br>RUNX1 | %    | MLL       | %  | Other     | %    |
|-------------------------------------------------------|----------|-----------|------|--------------|----|---------------|------|----------------|------|-----------|----|-----------|------|
|                                                       |          | 221       |      | 4            |    | 25            |      | 3              |      | 19        |    | 170       |      |
| <i>DMD</i>                                            | Xp21.1   | 15        | 6.8  | 0            | 0  | 5             | 20   | 0              | 0    | 0         | 0  | 10        | 5.8  |
| B cell pathway <sup>†††</sup>                         |          | 147       | 66.5 | 1            | 25 | 2             | 66.7 | 121            | 71.2 | 18        | 72 | 5         | 26.3 |
| B cell pathway including <i>VPREB1</i> <sup>†††</sup> |          | 154       | 69.7 | 1            | 25 | 2             | 66.7 | 128            | 75.3 | 18        | 72 | 5         | 26.3 |
| B cell pathway lesion per case (mean, range)          |          | 1.3 (0-5) |      | 0.3 (0-1)    |    | 1.0 (0-2)     |      | 1.7 (0-3)      |      | 0.3 (0-1) |    | 1.5 (0-5) |      |

**Supplementary Table 5. Regions of recurring copy number alteration in the St Jude cohort.**

H50, high hyperdiploid, iAmp21, Intrachromosomal amplification of chromosome 21. \*Adjacent to *ZNF238*.

| Lesion                                  | Location         | All | %    | H50 | %    | TCF3-<br>PBX1 | %    | ETV6-<br>RUNX1 | %   | MLL | %    | Ph | %    | Hypo | %   | Other | %    |
|-----------------------------------------|------------------|-----|------|-----|------|---------------|------|----------------|-----|-----|------|----|------|------|-----|-------|------|
|                                         |                  | 258 |      | 44  |      | 17            |      | 50             |     | 24  |      | 21 |      | 10   |     | 92    |      |
| <i>PDE4B</i>                            | 1p31.2           | 2   | 8    | 0   | 0    | 0             | 0    | 2              | 4   | 0   | 0    | 0  | 0    | 0    | 0   | 0     | 0    |
| <i>NRAS</i>                             | 1p13.1           | 1   | 4    | 0   | 0    | 0             | 0    | 0              | 0   | 0   | 0    | 0  | 0    | 0    | 0   | 1     | 1.1  |
| <i>ADAR</i>                             | 1q22             | 2   | 8    | 0   | 0    | 0             | 0    | 0              | 0   | 0   | 0    | 0  | 0    | 0    | 0   | 2     | 2.2  |
| <i>LOC440742*</i>                       | 1q44             | 2   | 8    | 0   | 0    | 0             | 0    | 0              | 0   | 0   | 0    | 0  | 0    | 0    | 0   | 2     | 2.2  |
| 1q gain                                 | 1q23.3-<br>1qtel | 30  | 11.6 | 13  | 29.5 | 16            | 94.1 | 0              | 0   | 0   | 0    | 0  | 0    | 0    | 0   | 1     | 1.1  |
| <i>ARPP-21</i>                          | 3p22.3           | 8   | 3.1  | 1   | 2.3  | 0             | 0    | 2              | 4   | 0   | 0    | 1  | 4.8  | 2    | 20  | 2     | 2.2  |
| <i>FHIT</i>                             | 3p14.2           | 12  | 4.7  | 0   | 0    | 0             | 0    | 6              | 12  | 0   | 0    | 2  | 9.5  | 1    | 10  | 3     | 3.3  |
| <i>FLNB</i>                             | 3p14.3           | 7   | 2.7  | 1   | 2.3  | 0             | 0    | 1              | 2   | 0   | 0    | 1  | 4.8  | 1    | 10  | 3     | 3.3  |
| <i>BTLA/CD200</i>                       | 3q13.2           | 16  | 6.2  | 0   | 0    | 0             | 0    | 8              | 16  | 0   | 0    | 5  | 23.8 | 1    | 10  | 2     | 2.2  |
| <i>MBNL1</i>                            | 3q25.1           | 9   | 3.5  | 2   | 4.5  | 0             | 0    | 3              | 6   | 0   | 0    | 2  | 9.5  | 1    | 10  | 1     | 1.1  |
| <i>TBL1XR1</i>                          | 3q26.32          | 15  | 5.8  | 1   | 2.3  | 0             | 0    | 8              | 16  | 1   | 4.2  | 1  | 4.8  | 0    | 0   | 4     | 4.3  |
| <i>ILIRAP</i>                           | 3q28             | 3   | 1.2  | 0   | 0    | 0             | 0    | 1              | 2   | 0   | 0    | 1  | 4.8  | 1    | 10  | 0     | 0    |
| <i>ARHGAP24</i>                         | 4q21.23          | 2   | 8    | 0   | 0    | 0             | 0    | 0              | 0   | 0   | 0    | 0  | 0    | 1    | 10  | 1     | 1.1  |
| <i>NR3C2</i>                            | 4q31.23          | 10  | 3.9  | 0   | 0    | 0             | 0    | 6              | 12  | 0   | 0    | 0  | 0    | 1    | 10  | 3     | 3.3  |
| <i>LEF1</i>                             | 4q25             | 5   | 1.9  | 0   | 0    | 0             | 0    | 2              | 4.0 | 0   | 0    | 0  | 0    | 1    | 10  | 2     | 2.2  |
| <i>FBXW7</i>                            | 4q31.3           | 5   | 1.9  | 0   | 0    | 0             | 0    | 1              | 2   | 0   | 0    | 1  | 4.8  | 1    | 10  | 2     | 2.2  |
| <i>EBF1</i>                             | 5q33.3           | 12  | 4.7  | 1   | 2.3  | 0             | 0    | 5              | 10  | 0   | 0    | 3  | 14.3 | 1    | 10  | 2     | 2.2  |
| Histone cluster                         | 6p22.2           | 21  | 8.1  | 1   | 2.3  | 0             | 0    | 3              | 6   | 0   | 0    | 3  | 14.3 | 3    | 30  | 11    | 12   |
| <i>GRIK2</i>                            | 6q16             | 11  | 4.3  | 1   | 2.3  | 1             | 5.9  | 7              | 14  | 0   | 0    | 0  | 0    | 0    | 0   | 2     | 2.2  |
| <i>ARMC2/SESNI</i>                      | 6q21             | 13  | 5    | 0   | 0    | 0             | 0    | 8              | 16  | 0   | 0    | 0  | 0    | 0    | 0   | 5     | 5.4  |
| 4LOC389437                              | 6q25.3           | 7   | 2.7  | 0   | 0    | 0             | 0    | 4              | 8   | 0   | 0    | 0  | 0    | 1    | 10  | 2     | 2/2  |
| <i>IKZF1</i>                            | 7p13             | 48  | 18.6 | 4   | 9.1  | 0             | 0    | 0              | 0   | 1   | 4.2  | 16 | 76.2 | 5    | 50  | 22    | 22.8 |
| <i>CDK6</i>                             | 7q21.2           | 8   | 3.1  | 1   | 2.3  | 0             | 0    | 0              | 0   | 0   | 0    | 2  | 9.5  | 3    | 30  | 2     | 2.2  |
| <i>MSRA</i>                             | 8p23             | 6   | 2.3  | 0   | 0    | 0             | 0    | 2              | 4.0 | 0   | 0    | 1  | 4.8  | 2    | 20  | 1     | 1.1  |
| <i>TOX</i>                              | 8q12.1           | 11  | 4.3  | 0   | 0    | 0             | 0    | 5              | 10  | 0   | 0    | 1  | 4.8  | 0    | 0   | 5     | 5.4  |
| <i>CCDC26</i>                           | 8q24.21          | 5   | 1.9  | 1   | 2.3  | 0             | 0    | 0              | 0   | 0   | 0    | 0  | 0    | 0    | 0   | 4     | 4.3  |
| <i>CDKN2A/B</i>                         | 9p21.3           | 87  | 33.7 | 9   | 20.5 | 6             | 35.3 | 15             | 30  | 4   | 16.7 | 11 | 52.4 | 10   | 100 | 32    | 34.8 |
| <i>PAX5</i> CNA                         | 9p13.2           | 79  | 30.6 | 4   | 9.1  | 7             | 41.2 | 17             | 34  | 4   | 16.7 | 11 | 52.4 | 10   | 100 | 26    | 28.3 |
| <i>PAX5</i> CNA or<br>sequence mutation | 9p13.2           | 83  | 32.2 | 4   | 9.1  | 8             | 47.1 | 17             | 34  | 5   | 20.8 | 11 | 52.4 | 10   | 100 | 28    | 30.4 |

| Lesion                     | Location      | All | %    | H50 | %    | TCF3-<br>PBX1 | %    | ETV6-<br>RUNX1 | %  | MLL | %    | Ph | %    | Hypo | %   | Other | %    |
|----------------------------|---------------|-----|------|-----|------|---------------|------|----------------|----|-----|------|----|------|------|-----|-------|------|
|                            |               | 258 |      | 44  |      | 17            |      | 50             |    | 24  |      | 21 |      | 10   |     | 92    |      |
| <i>ABL1</i>                | 9q34.13       | 5   | 1.9  | 0   | 0    | 0             | 0    | 0              | 0  | 0   | 0    | 4  | 19   | 1    | 10  | 0     | 0    |
| <i>ADARB2</i>              | 10p15.2       | 1   | 4    | 0   | 0    | 0             | 0    | 0              | 0  | 0   | 0    | 1  | 4.8  | 0    | 0   | 0     | 0    |
| <i>COPEB/KLF6</i>          | 10p15         | 0   | 0    | 0   | 0    | 0             | 0    | 0              | 0  | 0   | 0    | 0  | 0    | 0    | 0   | 0     | 0    |
| <i>PTEN</i>                | 10q23.31      | 0   | 0    | 0   | 0    | 0             | 0    | 0              | 0  | 0   | 0    | 0  | 0    | 0    | 0   | 0     | 0    |
| <i>BLNK</i>                | 10q24.1       | 3   | 1.2  | 0   | 0    | 0             | 0    | 2              | 4  | 0   | 0    | 0  | 0    | 0    | 0   | 1     | 1.1  |
| <i>ADD3</i>                | 10q25.2       | 14  | 5.4  | 1   | 2.3  | 0             | 0    | 4              | 8  | 0   | 0    | 5  | 23.8 | 0    | 0   | 4     | 4.3  |
| <i>RAG1/2</i>              | 11p12         | 15  | 5.8  | 0   | 0    | 0             | 0    | 8              | 16 | 1   | 4.2  | 0  | 0    | 0    | 0   | 6     | 6.5  |
| <i>NUP160/PTPRJ</i>        | 11p11.2       | 1   | 4    | 0   | 0    | 0             | 0    | 0              | 0  | 0   | 0    | 0  | 0    | 0    | 0   | 1     | 1.1  |
| <i>ATM</i>                 | 11q22.3       | 7   | 2.7  | 0   | 0    | 0             | 0    | 2              | 4  | 0   | 0    | 1  | 4.8  | 0    | 0   | 4     | 4.3  |
| <i>ETV6</i>                | 12p13.2       | 63  | 24.4 | 5   | 11.5 | 0             | 0    | 34             | 68 | 2   | 8.3  | 2  | 9.5  | 2    | 20  | 18    | 19.6 |
| <i>KRAS</i>                | 12p12.1       | 20  | 7.8  | 2   | 4.5  | 0             | 0    | 8              | 16 | 1   | 4.2  | 0  | 0    | 1    | 10  | 8     | 8.7  |
| <i>BTG1</i>                | 12q21.33      | 18  | 7.0  | 0   | 0    | 0             | 0    | 7              | 14 | 0   | 0    | 4  | 19   | 1    | 10  | 6     | 6.5  |
| <i>ZMYM5</i>               | 13q12.11      | 5   | 1.9  | 1   | 2.3  | 0             | 0    | 2              | 4  | 0   | 0    | 0  | 0    | 0    | 0   | 2     | 2.2  |
| <i>ELF1</i>                | 13q14.11      | 12  | 4.7  | 2   | 4.5  | 2             | 11.8 | 4              | 8  | 1   | 4.2  | 0  | 0    | 1    | 10  | 2     | 2.2  |
| <i>C13orf21/TSC22D1</i>    | 13q14         | 15  | 5.8  | 2   | 4.5  | 2             | 11.8 | 4              | 8  | 1   | 4.2  | 2  | 9.5  | 1    | 10  | 3     | 3.3  |
| <i>RB1</i>                 | 13q14.2       | 15  | 5.8  | 3   | 6.8  | 2             | 11.8 | 2              | 4  | 2   | 8.3  | 4  | 19   | 0    | 0   | 2     | 2.2  |
| <i>DLEU2/7/mir15/-16a)</i> | 13q14         | 16  | 6.2  | 5   | 11.4 | 2             | 11.8 | 3              | 6  | 3   | 12.5 | 1  | 4.8  | 0    | 0   | 2     | 2.2  |
| <i>ATP10A</i>              | 15q12         | 5   | 1.9  | 0   | 0    | 0             | 0    | 1              | 2  | 0   | 0    | 1  | 4.8  | 1    | 10  | 2     | 2.2  |
| <i>SPRED1 (5')</i>         | 15q14         | 6   | 2.3  | 0   | 0    | 0             | 0    | 0              | 0  | 0   | 0    | 1  | 4.8  | 1    | 10  | 4     | 4.3  |
| <i>LTK</i>                 | 15q15.1       | 6   | 2.3  | 0   | 0    | 0             | 0    | 3              | 6  | 0   | 0    | 0  | 0    | 1    | 10  | 2     | 2.2  |
| <i>NF1</i>                 | 17q11.2       | 8   | 3.1  | 1   | 2.3  | 0             | 0    | 2              | 4  | 0   | 0    | 0  | 0    | 1    | 10  | 4     | 4.3  |
| <i>IKZF3 (AIOLOS)</i>      | 17q21.1       | 3   | 1.2  | 0   | 0    | 0             | 0    | 0              | 0  | 0   | 0    | 0  | 0    | 2    | 20  | 1     | 1.1  |
| <i>TCF3</i>                | 19p13.3       | 17  | 6.6  | 1   | 2.3  | 16            | 94.1 | 0              | 0  | 0   | 0    | 0  | 0    | 0    | 0   | 0     | 0    |
| <i>C20orf94</i>            | 20p12.2       | 20  | 7.8  | 2   | 4.5  | 0             | 0    | 7              | 14 | 0   | 0    | 7  | 33.3 | 0    | 0   | 4     | 4.3  |
| <i>ERG</i>                 | 21q22         | 14  | 5.4  | 0   | 0    | 0             | 0    | 0              | 0  | 0   | 0    | 0  | 0    | 0    | 0   | 14    | 15.2 |
| iAmp21*                    | 21,<br>varies | 11  | 4.3  | 0   | 0    | 0             | 0    | 5              | 10 | 0   | 0    | 0  | 0    | 0    | 0   | 6     | 6.5  |
| <i>VPREB1</i>              | 22q11.22      | 80  | 31   | 7   | 15.9 | 1             | 5.9  | 35             | 70 | 1   | 4.2  | 7  | 33.3 | 3    | 30  | 26    | 28.3 |
| <i>IL3RA</i>               | Xp22.33       | 18  | 7.0  | 1   | 2.3  | 0             | 0    | 6              | 12 | 0   | 0    | 0  | 0    | 1    | 10  | 10    | 10.9 |
| <i>DMD</i>                 | Xp21.1        | 11  | 4.3  | 1   | 2.3  | 0             | 0    | 4              | 8  | 0   | 0    | 0  | 0    | 0    | 0   | 6     | 6.5  |
| B pathway                  |               | 137 | 53.1 | 11  | 25   | 17            | 100  | 27             | 54 | 6   | 25   | 16 | 76.2 | 10   | 100 | 50    | 53.4 |
| B pathway with<br>VPREB1   |               | 169 | 65.5 | 16  | 36.4 | 17            | 100  | 42             | 64 | 6   | 25   | 16 | 76.2 | 10   | 100 | 62    | 67.4 |

**Supplementary Table 6. Results of *PAX5* genomic quantitative PCR.**

Results represent means of duplicate measurements, and are ratios of *PAX5* to control (RNase P). Values <0.75 represent hemizygous deletion, and <0.3 homozygous deletion.

| Sample ID | Group            | <i>PAX5</i> deletion region | Exon 3 | Exon 6 | Exon 8 |
|-----------|------------------|-----------------------------|--------|--------|--------|
| 9906_002  | <i>TCF3-PBX1</i> | All gene                    | 0.60   | 0.58   | 0.61   |
| 9906_004  | Other            | 5' to distal                | 0.13   | 0.16   | 0.20   |
| 9906_009  | Other            | 5' to distal                | 0.47   | 0.53   | 0.58   |
| 9906_013  | Other            | e3 - distal                 | 0.54   | 0.31   | 0.33   |
| 9906_014  | Other            | e2 - e5                     | 0.57   | 1.05   | 1.05   |
| 9906_028  | <i>TCF3-PBX1</i> | All gene                    | 0.44   | 0.50   | 0.44   |
| 9906_034  | Other            | All gene                    | 0.31   | 0.30   | 0.29   |
| 9906_037  | Other            | e6 – distal                 | 0.70   | 0.38   | 0.38   |
| 9906_040  | Other            | All gene                    | 0.31   | 0.35   | 0.37   |
| 9906_045  | Other            | All gene                    | 0.60   | 0.60   | 0.61   |
| 9906_046  | <i>TCF3-PBX1</i> | All gene                    | 0.42   | 0.41   | 0.39   |
| 9906_048  | Other            | 5' - e7                     | 0.39   | 0.12   | 0.65   |
| 9906_055  | Other            | e2 - e5                     | 0.51   | 0.92   | 1.02   |
| 9906_063  | <i>TCF3-PBX1</i> | e6                          | 0.48   | 0.32   | 0.55   |
| 9906_065  | Other            | All gene                    | 0.50   | 0.52   | 0.47   |
| 9906_070  | Other            | Promoter - e3               | 0.59   | 0.76   | 0.96   |
| 9906_080  | Other            | e7-distal                   | 0.80   | 0.84   | 0.50   |
| 9906_098  | Other            | e9                          | 0.95   | 0.95   | 0.94   |
| 9906_102  | Other            | Amplification e2-e5         | 2.77   | 1.21   | 0.90   |
| 9906_107  | Other            | e7-distal                   | 1.15   | 1.16   | 0.63   |
| 9906_111  | Other            | e6-distal                   | 1.09   | 0.60   | 0.57   |
| 9906_118  | Other            | Promoter - e5               | 0.72   | 1.16   | 0.97   |
| 9906_124  | Other            | e2-e4, e6                   | 0.54   | 0.53   | 1.00   |
| 9906_141  | Other            | e2-e5                       | 0.61   | 1.06   | 0.98   |
| 9906_154  | Other            | e2-e8                       | 0.49   | 0.48   | 0.43   |
| 9906_157  | Other            | e2-e6                       | 0.42   | 0.44   | 0.86   |
| 9906_160  | Other            | All gene                    | 0.57   | 0.63   | 0.56   |
| 9906_161  | Other            | 5' - e3                     | 0.33   | 0.59   | 0.65   |
| 9906_163  | <i>TCF3-PBX1</i> | 5' - e7                     | 0.03   | 0.03   | 0.04   |
| 9906_175  | Other            | e6-8                        | 0.97   | 0.54   | 0.55   |
| 9906_180  | Other            | 5' - e7                     | 0.71   | 0.35   | 0.81   |
| 9906_192  | Other            | e8-9                        | 0.78   | 0.83   | 0.43   |
| 9906_196  | Other            | e2-e7, homozygous e6-7      | 0.49   | 0.06   | 0.99   |
| 9906_218  | <i>TCF3-PBX1</i> | All gene                    | 0.44   | 0.46   | 0.50   |
| 9906_268  | Other            | e6-distal                   | 1.13   | 0.64   | 0.76   |

**Supplementary Table 7. *PAX5* sequence mutations in the P9906 cohort.**

Five cases had two point mutations in *trans*, and 11 cases had deletions of one *PAX5* allele and point mutation of the second allele. e, exon; fs, frameshift

| Sample ID | Group            | <i>PAX5</i> deletion | <i>PAX5</i> deletion region | <i>PAX5</i> mutation description |
|-----------|------------------|----------------------|-----------------------------|----------------------------------|
| 9906_034  | Other            | Yes                  | All gene                    | P80R                             |
| 9906_060  | Other            | No                   |                             | V151I                            |
| 9906_065  | Other            | Yes                  | All gene                    | G24R                             |
| 9906_086  | Other            | No                   |                             | G24R                             |
| 9906_106  | Other            | Yes                  | All gene                    | P80R                             |
| 9906_110  | Other            | No                   |                             | Exon 3 splice; D53V              |
| 9906_113  | Other            | No                   |                             | I139T                            |
| 9906_121  | Other            | Yes                  | All gene                    | P80R                             |
| 9906_156  | <i>TCF3-PBX1</i> | No                   |                             | I301T                            |
| 9906_173  | Other            | Yes                  | All gene                    | T333fs                           |
| 9906_179  | Other            | No                   |                             | P80R; E201fs                     |
| 9906_180  | Other            | Yes                  | Promoter-e7                 | S213L                            |
| 9906_188  | Other            | Yes                  | All gene                    | P80R                             |
| 9906_192  | Other            | Yes                  | e8-9                        | R59G                             |
| 9906_195  | Other            | No                   |                             | T75R; V336fs                     |
| 9906_228  | Other            | No                   |                             | P80R; E201fs                     |
| 9906_233  | Other            | No                   |                             | P80R; E7 splice                  |
| 9906_234  | Other            | Yes                  | Focal promoter              | E9 splice                        |
| 9906_235  | Other            | Yes                  | All gene                    | E9 splice                        |
| 9906_239  | Other            | No                   |                             | V319FS                           |
| 9906_256  | Other            | Yes                  | All gene                    | P80R                             |
| 9906_258  | Other            | No                   |                             | V319FS                           |

**Supplementary Table 8. Description all P9906 cases harboring *IKZF1* deletions and/or sequence mutations, and results of genomic quantitative PCR results for *IKZF1* deletions.**

Results represent means of duplicate measurements, and are ratios of *IKZF1* to control (RNase P). Values <0.75 represent hemizygous deletion, and <0.3 homozygous deletion. e, exon; fs, frameshift (mutation); gqPCR, genomic quantitative PCR; \*, nonsense mutation

| Sample ID | Group | <i>IKZF1</i> deletion | Region      | gqPCR exon 1 | gq PCR exon 3 | gqPCR exon 5 | gqPCR exon 6 | <i>IKZF1</i> mutation |
|-----------|-------|-----------------------|-------------|--------------|---------------|--------------|--------------|-----------------------|
| 9906_261  | MLL   | Yes                   | e3 - e6     | 0.96         |               | 0.58         | 0.59         |                       |
| 9906_001  | Other | Yes                   | e1 - e6     |              |               |              |              |                       |
| 9906_007  | Other | Yes                   | e3 - e6     | 1.57         | 0.56          |              | 0.53         |                       |
| 9906_014  | Other | Yes                   | e1 - 7      | 0.56         | 0.61          |              | 0.56         |                       |
| 9906_019  | Other | Yes                   | All gene    | 0.67         | 0.66          |              | 0.59         | G158S                 |
| 9906_021  | Other | Yes                   | All gene    |              |               |              |              |                       |
| 9906_024  | Other | No                    |             |              |               |              |              | H224fs                |
| 9906_027  | Other | Yes                   | e3 - e6     | 1.09         | 0.63          |              | 0.55         |                       |
| 9906_030  | Other | Yes                   | e3 - e6     | 1.23         |               |              | 0.59         |                       |
| 9906_033  | Other | Yes                   | e3 - e6     | 1.17         | 0.57          |              | 0.54         |                       |
| 9906_038  | Other | Yes                   | e3 - distal |              |               |              |              |                       |
| 9906_039  | Other | Yes                   | All gene    | 0.54         |               |              | 0.53         |                       |
| 9906_040  | Other | Yes                   | All gene    | 0.73         |               |              | 0.59         |                       |
| 9906_045  | Other | Yes                   | e3 - e6     | 0.97         |               | 0.56         | 0.71         |                       |
| 9906_047  | Other | Yes                   | e3 - e6     | 1.17         |               | 0.71         | 0.68         |                       |
| 9906_048  | Other | Yes                   | e1 - e6     | 0.65         | 0.72          |              | 0.64         |                       |
| 9906_049  | Other | Yes                   | All gene    | 0.71         | 0.75          |              | 0.71         |                       |
| 9906_055  | Other | Yes                   | All gene    |              |               |              |              | L117fs                |
| 9906_064  | Other | Yes                   | 5' - e1     | 0.59         |               | 0.99         | 1.02         |                       |
| 9906_065  | Other | No                    |             |              |               |              |              | S402fs                |
| 9906_078  | Other | Yes                   | 5' - e1     | 0.52         | 1.23          |              | 1.08         |                       |
| 9906_082  | Other | Yes                   | 5' - e1     | 0.56         |               | 1.02         | 1.09         |                       |
| 9906_084  | Other | Yes                   | e3 - e6     | 1.22         |               | 0.53         | 0.57         |                       |
| 9906_087  | Other | Yes                   | All gene    | 0.64         | 0.70          |              | 0.68         |                       |
| 9906_090  | Other | No                    |             |              |               |              |              | R111*                 |
| 9906_093  | Other | Yes                   | All gene    |              |               |              |              |                       |
| 9906_107  | Other | Yes                   | e3 - e6     | 1.11         |               | 0.57         | 0.65         |                       |
| 9906_109  | Other | Yes                   | 5' - e1     | 0.57         |               | 1.05         | 1.20         |                       |
| 9906_113  | Other | Yes                   | 5' - e1     | 0.54         |               | 1.05         | 1.47         |                       |
| 9906_118  | Other | Yes                   | All gene    | 0.59         | 0.61          |              | 0.61         |                       |
| 9906_120  | Other | Yes                   | All gene    |              |               |              |              |                       |
| 9906_124  | Other | Yes                   | e1 - e5     | 0.69         |               | 0.57         | 0.81         |                       |
| 9906_135  | Other | Yes                   | All gene    | 0.57         | 0.57          |              | 0.57         |                       |
| 9906_138  | Other | Yes                   | e1 - e5     |              |               |              |              |                       |
| 9906_141  | Other | Yes                   | e3 - e6     |              |               |              |              |                       |
| 9906_146  | Other | Yes                   | e3 - e6     |              |               |              |              |                       |
| 9906_151  | Other | Yes                   | e3 - e6     |              |               |              |              |                       |
| 9906_153  | Other | Yes                   | All gene    |              |               |              |              |                       |
| 9906_154  | Other | Yes                   | e1 - e3     | 0.53         |               | 1.00         | 1.40         |                       |

| Sample ID | Group | <i>IKZF1</i> deletion | Region                            | gqPCR exon 1 | gq PCR exon 3 | gqPCR exon 5 | gqPCR exon 6 | <i>IKZF1</i> mutation |
|-----------|-------|-----------------------|-----------------------------------|--------------|---------------|--------------|--------------|-----------------------|
| 9906_161  | Other | Yes                   | e3 – distal                       | 1.29         | 0.97          |              | 0.71         |                       |
| 9906_168  | Other | Yes                   | 5' - e1                           | 0.67         | 1.07          |              | 1.05         |                       |
| 9906_170  | Other | Yes                   | e1 - e4                           | 0.49         |               | 0.91         | 1.23         |                       |
| 9906_173  | Other | Yes                   | All gene                          | 0.74         |               | 0.66         | 0.65         |                       |
| 9906_174  | Other | Yes                   | e3 – distal                       | 1.63         |               | 0.57         | 0.63         |                       |
| 9906_175  | Other | Yes                   | All gene                          | 0.61         |               |              | 0.62         |                       |
| 9906_179  | Other | No                    |                                   |              |               |              |              | E504fs                |
| 9906_192  | Other | Yes                   | e3 – distal                       | 1.10         | 0.64          |              | 0.58         |                       |
| 9906_196  | Other | Yes                   | e2 - e5                           | 1.09         |               | 0.54         | 0.79         |                       |
| 9906_206  | Other | Yes                   | e1 - e4                           | 0.62         |               | 0.92         | 0.98         |                       |
| 9906_210  | Other | Yes                   | e1 - e6                           | 0.58         | 0.52          |              | 0.52         |                       |
| 9906_215  | Other | Yes                   | e1 - e4                           | 0.63         |               | 0.95         | 0.95         |                       |
| 9906_217  | Other | Yes                   | 5' - e6,<br>homozygous<br>5' - e1 | 0.11         |               | 0.55         | 0.82         |                       |
| 9906_219  | Other | Yes                   | All gene                          | 0.63         | 0.75          |              | 0.52         |                       |
| 9906_222  | Other | Yes                   | e3 - e6                           | 0.99         | 0.65          |              | 0.63         |                       |
| 9906_225  | Other | Yes                   | e3 - e6                           | 1.21         |               | 0.43         | 0.58         |                       |
| 9906_231  | Other | Yes                   | e3 - e6                           |              |               |              |              |                       |
| 9906_234  | Other | Yes                   | e1 - e6                           | 0.62         |               | 0.66         | 0.58         |                       |
| 9906_240  | Other | Yes                   | e1 - e6                           | 0.59         |               | 0.63         | 0.69         |                       |
| 9906_242  | Other | Yes                   | e3 - e6                           | 0.99         |               | 0.49         | 0.48         |                       |
| 9906_244  | Other | Yes                   | e3 - e6                           | 1.06         |               | 0.60         | 0.54         |                       |
| 9906_250  | Other | Yes                   | e1 - e6                           | 0.45         |               | 0.50         | 0.49         |                       |
| 9906_252  | Other | Yes                   | e3 - e6                           | 1.04         |               | 0.60         | 0.57         |                       |
| 9906_253  | Other | Yes                   | All gene                          | 0.45         |               | 0.46         | 0.45         |                       |
| 9906_257  | Other | Yes                   | e3 - e6                           | 0.97         | 0.91          |              | 0.65         |                       |
| 9906_258  | Other | Yes                   | e1 - e6                           | 0.61         |               | 0.62         | 0.62         |                       |
| 9906_262  | Other | Yes                   | e3 - e6                           | 0.96         |               | 0.53         | 0.52         |                       |
| 9906_271  | Other | Yes                   | e3 - distal                       |              |               |              |              |                       |

**Supplementary Table 9. Description of B-cell pathway lesions observed in the P9906 cohort.**

In addition to *PAX5* and *IKZF1* abnormalities, lesions were also identified in *TCF3* (N=21), *EBF1* (N=17), *RAG1/2* (N=8), *BLNK* (N=2), *BCL11A*, *IKZF2* (encoding the IKAROS family member HELIOS), *LEF1*, *MEF2C*, *SOX4* and *SP11* (PU.1) (1 each). deln, deletion; FS, frameshift.

| Sample ID | Group | Number of lesions | B cell pathway lesions                                                                        |
|-----------|-------|-------------------|-----------------------------------------------------------------------------------------------|
| 9906_001  | Other | 2                 | <i>IKZF1</i> deln; <i>VPREB1</i> deln                                                         |
| 9906_002  | E2A   | 2                 | <i>PAX5</i> deln; <i>TCF3</i> deln                                                            |
| 9906_003  | E2A   | 1                 | <i>TCF3</i> deln                                                                              |
| 9906_004  | Other | 1                 | <i>PAX5</i> deln                                                                              |
| 9906_007  | Other | 3                 | <i>IKZF1</i> deln; <i>VPREB1</i> deln; <i>MEF2C</i> deln                                      |
| 9906_009  | Other | 2                 | <i>PAX5</i> deln; <i>VPREB1</i> deln                                                          |
| 9906_010  | Other | 2                 | <i>EBF1</i> deln; <i>VPREB1</i> deln                                                          |
| 9906_011  | Other | 1                 | <i>IKZF2</i> deln                                                                             |
| 9906_012  | Other | 1                 | <i>EBF1</i> deln                                                                              |
| 9906_013  | Other | 1                 | <i>PAX5</i> deln;                                                                             |
| 9906_014  | Other | 4                 | <i>EBF1</i> deln; <i>IKZF1</i> deln; <i>PAX5</i> deln; <i>VPREB1</i> deln                     |
| 9906_016  | Other | 1                 | <i>EBF1</i> deln                                                                              |
| 9906_017  | E2A   | 1                 | <i>TCF3</i> deln                                                                              |
| 9906_019  | Other | 3                 | <i>IKZF1</i> deln; G158S <i>IKZF1</i> mutation; <i>VPREB1</i> deln                            |
| 9906_020  | Other | 2                 | <i>RAG1/2</i> deln; <i>VPREB1</i> deln                                                        |
| 9906_021  | Other | 3                 | <i>IKZF1</i> deln; <i>PAX5</i> deln; <i>VPREB1</i> deln                                       |
| 9906_024  | Other | 1                 | H224FS <i>IKZF1</i> mutation                                                                  |
| 9906_027  | Other | 3                 | <i>EBF1</i> deln; <i>IKZF1</i> deln; <i>VPREB1</i> deln                                       |
| 9906_028  | E2A   | 1                 | <i>PAX5</i> deln                                                                              |
| 9906_030  | Other | 1                 | <i>IKZF1</i> deln                                                                             |
| 9906_031  | Other | 1                 | <i>VPREB1</i> deln                                                                            |
| 9906_033  | Other | 1                 | <i>IKZF1</i> deln                                                                             |
| 9906_034  | Other | 4                 | <i>PAX5</i> deln; P80R <i>PAX5</i> mutation; <i>RAG1/2</i> deln; <i>LEF1</i> deln             |
| 9906_037  | Other | 2                 | <i>PAX5</i> deln; <i>RAG1/2</i> deln                                                          |
| 9906_038  | Other | 1                 | <i>IKZF1</i> deln                                                                             |
| 9906_039  | Other | 1                 | <i>IKZF1</i> deln                                                                             |
| 9906_040  | Other | 2                 | <i>IKZF1</i> deln; <i>PAX5</i> deln                                                           |
| 9906_045  | Other | 2                 | <i>IKZF1</i> deln; <i>PAX5</i> deln                                                           |
| 9906_046  | E2A   | 2                 | <i>PAX5</i> deln; <i>TCF3</i> deln                                                            |
| 9906_047  | Other | 2                 | <i>IKZF1</i> deln; <i>VPREB1</i> deln                                                         |
| 9906_048  | Other | 3                 | <i>IKZF1</i> deln; <i>PAX5</i> deln , homozygous                                              |
| 9906_049  | Other | 1                 | <i>IKZF1</i> deln                                                                             |
| 9906_052  | Other | 1                 | <i>VPREB1</i> deln                                                                            |
| 9906_055  | Other | 3                 | <i>IKZF1</i> deln; L117FS <i>IKZF1</i> mutation; <i>PAX5</i> deln                             |
| 9906_057  | Other | 1                 | <i>RAG1/2</i> deln                                                                            |
| 9906_058  | E2A   | 1                 | <i>TCF3</i> deln                                                                              |
| 9906_060  | Other | 2                 | V151I <i>PAX5</i> mutation; <i>VPREB1</i> deln                                                |
| 9906_063  | E2A   | 2                 | <i>PAX5</i> deln; <i>TCF3</i> deln                                                            |
| 9906_064  | Other | 2                 | <i>IKZF1</i> deln; <i>VPREB1</i> deln                                                         |
| 9906_065  | Other | 4                 | S402FS <i>IKZF1</i> mutation; <i>PAX5</i> deln; G24R <i>PAX5</i> mutation; <i>VPREB1</i> deln |
| 9906_066  | Other | 1                 | <i>PAX5</i> deln                                                                              |
| 9906_070  | Other | 1                 | <i>PAX5</i> deln                                                                              |

| Sample ID | Group | Number of lesions | B cell pathway lesions                                                                |
|-----------|-------|-------------------|---------------------------------------------------------------------------------------|
| 9906_071  | E2A   | 1                 | <i>PAX5</i> deln                                                                      |
| 9906_073  | Other | 2                 | <i>RAG1/2</i> deln; <i>TCF3</i> deln                                                  |
| 9906_075  | E2A   | 2                 | <i>PAX5</i> deln; <i>TCF3</i> deln                                                    |
| 9906_078  | Other | 2                 | <i>IKZF1</i> deln; <i>VPREB1</i> deln                                                 |
| 9906_079  | E2A   | 2                 | <i>PAX5</i> deln; <i>TCF3</i> deln                                                    |
| 9906_080  | Other | 1                 | <i>PAX5</i> deln                                                                      |
| 9906_082  | Other | 3                 | <i>IKZF1</i> deln; <i>PAX5</i> deln; <i>VPREB1</i> deln                               |
| 9906_083  | TEL   | 3                 | <i>EBF1</i> deln; <i>VPREB1</i> deln; <i>SOX4</i> deln                                |
| 9906_084  | Other | 3                 | <i>EBF1</i> deln; <i>IKZF1</i> deln; <i>VPREB1</i> deln                               |
| 9906_085  | Other | 1                 | <i>RAG1/2</i> deln                                                                    |
| 9906_086  | Other | 1                 | G24R <i>PAX5</i> mutation                                                             |
| 9906_087  | Other | 1                 | <i>IKZF1</i> deln                                                                     |
| 9906_090  | Other | 4                 | <i>EBF1</i> deln; R111* <i>IKZF1</i> mutation; <i>RAG1/2</i> deln; <i>VPREB1</i> deln |
| 9906_092  | Other | 1                 | <i>VPREB1</i> deln                                                                    |
| 9906_093  | Other | 1                 | <i>IKZF1</i> deln                                                                     |
| 9906_094  | Other | 1                 | <i>BLNK</i> deln                                                                      |
| 9906_096  | E2A   | 2                 | <i>PAX5</i> deln; <i>TCF3</i> deln                                                    |
| 9906_097  | MLL   | 1                 | <i>PAX5</i> deln                                                                      |
| 9906_098  | Other | 1                 | <i>PAX5</i> deln                                                                      |
| 9906_102  | Other | 2                 | focal internal <i>PAX5</i> amplification; <i>VPREB1</i> deln                          |
| 9906_106  | Other | 2                 | <i>PAX5</i> deln; P80R <i>PAX5</i> mutation                                           |
| 9906_107  | Other | 2                 | <i>IKZF1</i> deln; <i>PAX5</i> deln                                                   |
| 9906_108  | Other | 1                 | <i>PAX5</i> deln                                                                      |
| 9906_109  | Other | 3                 | <i>EBF1</i> deln; <i>IKZF1</i> deln; <i>TCF3</i> deln                                 |
| 9906_110  | Other | 3                 | D53V and E3 splice <i>PAX5</i> mutation; <i>VPREB1</i> deln                           |
| 9906_111  | Other | 1                 | <i>PAX5</i> deln                                                                      |
| 9906_113  | Other | 3                 | <i>IKZF1</i> deln; I139T <i>PAX5</i> mutation; <i>VPREB1</i> deln                     |
| 9906_114  | Other | 2                 | <i>VPREB1</i> deln; <i>BCL11A</i> deln                                                |
| 9906_117  | Other | 2                 | <i>EBF1</i> deln; <i>VPREB1</i> deln                                                  |
| 9906_118  | Other | 2                 | <i>IKZF1</i> deln; <i>PAX5</i> deln                                                   |
| 9906_120  | Other | 3                 | <i>IKZF1</i> deln; <i>PAX5</i> deln; <i>VPREB1</i> deln                               |
| 9906_121  | Other | 2                 | <i>PAX5</i> deln; P80R <i>PAX5</i> mutation                                           |
| 9906_124  | Other | 3                 | <i>IKZF1</i> deln; <i>PAX5</i> deln; <i>VPREB1</i> deln                               |
| 9906_128  | MLL   | 1                 | <i>RAG1/2</i> deln                                                                    |
| 9906_135  | Other | 1                 | <i>IKZF1</i> deln                                                                     |
| 9906_137  | MLL   | 1                 | <i>RAG1/2</i> deln                                                                    |
| 9906_138  | Other | 1                 | <i>IKZF1</i> deln                                                                     |
| 9906_141  | Other | 3                 | <i>IKZF1</i> deln; <i>PAX5</i> deln; <i>VPREB1</i> deln                               |
| 9906_144  | Other | 1                 | <i>VPREB1</i> deln                                                                    |
| 9906_145  | Other | 2                 | <i>PAX5</i> deln; <i>VPREB1</i> deln                                                  |
| 9906_146  | Other | 1                 | <i>IKZF1</i> deln                                                                     |
| 9906_147  | Other | 2                 | <i>PAX5</i> deln; <i>VPREB1</i> deln                                                  |
| 9906_148  | Other | 1                 | <i>PAX5</i> deln                                                                      |
| 9906_150  | Other | 2                 | <i>PAX5</i> deln; <i>VPREB1</i> deln                                                  |
| 9906_151  | Other | 2                 | <i>IKZF1</i> deln; <i>VPREB1</i> deln                                                 |
| 9906_153  | Other | 2                 | <i>IKZF1</i> deln; <i>VPREB1</i> deln                                                 |
| 9906_154  | Other | 2                 | <i>IKZF1</i> deln; <i>PAX5</i> deln                                                   |
| 9906_155  | Other | 1                 | <i>VPREB1</i> deln                                                                    |
| 9906_156  | E2A   | 1                 | I301T <i>PAX5</i> mutation                                                            |
| 9906_157  | Other | 2                 | <i>PAX5</i> deln; <i>VPREB1</i> deln                                                  |
| 9906_159  | E2A   | 1                 | <i>TCF3</i> deln                                                                      |
| 9906_160  | Other | 2                 | <i>PAX5</i> deln; <i>VPREB1</i> deln                                                  |

| Sample ID | Group | Number of lesions | B cell pathway lesions                                                                 |
|-----------|-------|-------------------|----------------------------------------------------------------------------------------|
| 9906_161  | Other | 3                 | <i>IKZF1</i> deln; <i>PAX5</i> deln; <i>VPREB1</i> deln                                |
| 9906_163  | E2A   | 2                 | <i>PAX5</i> deln; <i>TCF3</i> deln                                                     |
| 9906_166  | E2A   | 1                 | <i>TCF3</i> deln                                                                       |
| 9906_168  | Other | 3                 | <i>EBF1</i> deln; <i>IKZF1</i> deln; <i>RAG1/2</i> deln                                |
| 9906_170  | Other | 1                 | <i>IKZF1</i> deln                                                                      |
| 9906_171  | T4_10 | 1                 | <i>PAX5</i> deln                                                                       |
| 9906_173  | Other | 3                 | <i>IKZF1</i> deln; <i>PAX5</i> deln; T333FS <i>PAX5</i> mutation                       |
| 9906_174  | Other | 1                 | <i>IKZF1</i> deln                                                                      |
| 9906_175  | Other | 3                 | <i>IKZF1</i> deln; <i>PAX5</i> deln; <i>VPREB1</i> deln                                |
| 9906_176  | Other | 1                 | <i>PAX5</i> deln                                                                       |
| 9906_177  | Other | 1                 | <i>PAX5</i> deln                                                                       |
| 9906_179  | Other | 4                 | E504FS <i>IKZF1</i> mutation; P80R and E201FS <i>PAX5</i> mutation; <i>VPREB1</i> deln |
| 9906_180  | Other | 2                 | <i>PAX5</i> deln; S213L <i>PAX5</i> mutation                                           |
| 9906_183  | Other | 2                 | <i>RAG1/2</i> deln; <i>SPI1</i> deln                                                   |
| 9906_184  | Other | 1                 | <i>PAX5</i> deln                                                                       |
| 9906_185  | Other | 2                 | <i>VPREB1</i> deln; <i>BLNK</i> deln                                                   |
| 9906_188  | Other | 2                 | <i>PAX5</i> deln; P80R <i>PAX5</i> mutation                                            |
| 9906_192  | Other | 3                 | <i>IKZF1</i> deln; <i>PAX5</i> deln; R59G <i>PAX5</i> mutation                         |
| 9906_193  | Other | 1                 | <i>VPREB1</i> deln                                                                     |
| 9906_195  | Other | 2                 | T75R and V336FS <i>PAX5</i> mutation                                                   |
| 9906_196  | Other | 4                 | <i>IKZF1</i> deln; <i>PAX5</i> deln, homozygous; <i>VPREB1</i> deln                    |
| 9906_199  | Other | 1                 | <i>PAX5</i> deln                                                                       |
| 9906_202  | E2A   | 1                 | <i>TCF3</i> deln                                                                       |
| 9906_206  | Other | 2                 | <i>EBF1</i> deln; <i>IKZF1</i> deln                                                    |
| 9906_210  | Other | 3                 | <i>IKZF1</i> deln; <i>PAX5</i> deln; <i>VPREB1</i> deln                                |
| 9906_215  | Other | 3                 | <i>PAX5</i> deln; <i>IKZF1</i> deln; <i>VPREB1</i> deln                                |
| 9906_217  | Other | 3                 | <i>EBF1</i> deln; <i>IKZF1</i> deln, homozygous                                        |
| 9906_218  | E2A   | 2                 | <i>PAX5</i> deln; <i>TCF3</i> deln                                                     |
| 9906_219  | Other | 2                 | <i>IKZF1</i> deln; <i>TCF3</i> deln                                                    |
| 9906_222  | Other | 2                 | <i>EBF1</i> deln; <i>IKZF1</i> deln                                                    |
| 9906_225  | Other | 4                 | <i>IKZF1</i> deln; <i>PAX5</i> deln; <i>RAG1/2</i> deln; <i>VPREB1</i> deln            |
| 9906_227  | MLL   | 1                 | M31V <i>IKZF1</i> mutation                                                             |
| 9906_228  | Other | 2                 | P80R and E201FS <i>PAX5</i> mutation                                                   |
| 9906_231  | Other | 2                 | <i>IKZF1</i> deln; <i>VPREB1</i> deln                                                  |
| 9906_233  | Other | 2                 | P80R and E7 splice <i>PAX5</i> mutation                                                |
| 9906_234  | Other | 3                 | <i>IKZF1</i> deln; <i>PAX5</i> deln; E9 splice <i>PAX5</i> mutation                    |
| 9906_235  | Other | 2                 | <i>PAX5</i> deln; E9 splice <i>PAX5</i> mutation                                       |
| 9906_236  | E2A   | 1                 | <i>TCF3</i> deln                                                                       |
| 9906_239  | Other | 2                 | V319FS <i>PAX5</i> mutation; <i>VPREB1</i> deln                                        |
| 9906_240  | Other | 1                 | <i>IKZF1</i> deln                                                                      |
| 9906_242  | Other | 1                 | <i>IKZF1</i> deln                                                                      |
| 9906_243  | TEL   | 2                 | <i>PAX5</i> deln; <i>VPREB1</i> deln                                                   |
| 9906_244  | Other | 1                 | <i>IKZF1</i> deln                                                                      |
| 9906_250  | Other | 4                 | <i>EBF1</i> deln; <i>IKZF1</i> deln; <i>PAX5</i> deln; <i>VPREB1</i> deln              |
| 9906_252  | Other | 1                 | <i>IKZF1</i> deln                                                                      |
| 9906_253  | Other | 1                 | <i>IKZF1</i> deln                                                                      |
| 9906_254  | Other | 1                 | <i>PAX5</i> deln                                                                       |
| 9906_255  | Other | 1                 | focal internal <i>PAX5</i> amplification                                               |
| 9906_256  | Other | 2                 | <i>PAX5</i> deln; P80R <i>PAX5</i> mutation                                            |
| 9906_257  | Other | 3                 | <i>IKZF1</i> deln; <i>PAX5</i> deln; <i>VPREB1</i> deln                                |
| 9906_258  | Other | 5                 | <i>EBF1</i> deln; <i>IKZF1</i> deln; V319FS <i>PAX5</i> mutation; <i>RAG1/2</i> deln;  |

| Sample ID | Group | Number of lesions | B cell pathway lesions                                  |
|-----------|-------|-------------------|---------------------------------------------------------|
|           |       |                   | <i>VPREB1</i> deln                                      |
| 9906_259  | Other | 1                 | <i>VPREB1</i> deln                                      |
| 9906_260  | Other | 1                 | <i>RAG1/2</i> deln                                      |
| 9906_261  | MLL   | 1                 | <i>IKZF1</i> deln                                       |
| 9906_262  | Other | 2                 | <i>IKZF1</i> deln; <i>VPREB1</i> deln                   |
| 9906_263  | Other | 2                 | <i>TCF3</i> deln; <i>VPREB1</i> deln                    |
| 9906_264  | Other | 1                 | <i>PAX5</i> deln; <i>TCF3</i> deln                      |
| 9906_265  | Other | 1                 | <i>TCF3</i> deln                                        |
| 9906_268  | Other | 1                 | <i>PAX5</i> deln                                        |
| 9906_271  | Other | 3                 | <i>EBF1</i> deln; <i>IKZF1</i> deln; <i>VPREB1</i> deln |

**Supplementary Table 10. Variation in number of B cell pathway lesions between P9906 ALL subtypes**

| Group                                        | Mean number of B cell pathway lesions | Range   |
|----------------------------------------------|---------------------------------------|---------|
| All                                          | 1.3 (0-5)                             | 0-5     |
| <i>TCF3-PBX1</i>                             | 1.0 (0-2)                             | 0-2     |
| <i>MLL</i> -rearranged                       | 0.3 (0-1)                             | 0-1     |
| Other                                        | 1.5 (0-5)                             | 0-5     |
| Hyperdiploid                                 | 0.3 (0-1)                             | 0-1     |
| <i>ETV6-RUNX1</i>                            | 1.7 (0-1)                             | 0-3     |
| ANOVA P=0.0001                               |                                       |         |
| Results of ANOVA post hoc Fisher's PLSD test |                                       |         |
|                                              | Mean Diff.                            | P       |
| Hyperdiploid, <i>TCF3-PBX1</i>               | -0.79                                 | 0.18    |
| Hyperdiploid, <i>ETV6-RUNX1</i>              | -1.417                                | 0.093   |
| Hyperdiploid, <i>MLL</i>                     | -0.013                                | 0.98    |
| Hyperdiploid, Other                          | -1.215                                | 0.030   |
| <i>TCF3-PBX1</i> , <i>ETV6-RUNX1</i>         | -0.627                                | 0.35    |
| <i>TCF3-PBX1</i> , <i>MLL</i>                | 0.777                                 | 0.02    |
| <i>TCF3-PBX1</i> , Other                     | -0.425                                | 0.07    |
| <i>ETV6-RUNX1</i> , <i>MLL</i>               | 1.404                                 | 0.041   |
| <i>ETV6-RUNX1</i> , Other                    | 0.202                                 | 0.75    |
| <i>MLL</i> , Other                           | -1.202                                | <0.0001 |

**Supplementary Table 11. Genes with univariate Cox score exceeding threshold of  $\pm 1.8$  in SPC analysis, P9906 cohort.**

Raw score refers to the modified univariate Cox score calculated for each gene. Importance score is a measure of correlation between each gene and the first principal component derived from the SPC analysis.

| Name                 | Raw score | Importance score |
|----------------------|-----------|------------------|
| <i>IKZF1</i>         | -4.002    | -26.569          |
| <i>MKKS/C20orf94</i> | -2.075    | -7.928           |
| <i>BTLA</i>          | -2.137    | -5.625           |
| <i>EBF1</i>          | -2.277    | -5.316           |
| <i>NRAS</i>          | 1.824     | 1.53             |
| <i>FLNB</i>          | -1.824    | -1.469           |
| <i>ZNF238</i>        | -1.885    | -1.159           |
| <i>C1orf131</i>      | -1.802    | -0.878           |
| <i>HAAO</i>          | -1.861    | 0.787            |
| <i>SRBD1</i>         | -1.936    | 0.671            |
| <i>SUSD3</i>         | -1.84     | -0.593           |
| <i>FOXN2</i>         | -1.904    | 0.57             |
| <i>PRKCE</i>         | -1.811    | 0.541            |
| <i>C9orf71</i>       | -1.907    | 0.491            |
| <i>PPM1B</i>         | -1.902    | 0.478            |
| <i>FAM82A</i>        | -1.872    | 0.359            |
| <i>FXN</i>           | -2.503    | 0.325            |
| <i>SLC46A2</i>       | -1.816    | -0.254           |
| <i>PRKACG</i>        | -2.862    | -0.123           |
| <i>RHOQ</i>          | -1.855    | 0.077            |

**Supplementary Table 12. Genes with univariate Cox score exceeding threshold of  $\pm 1.9$  in SPC analysis, St Jude cohort.**

Raw score refers to the modified univariate Cox score calculated for each gene. Importance score is a measure of correlation between each gene and the first principal component derived from the SPC analysis.

| Name             | Raw score | Importance score |
|------------------|-----------|------------------|
| <i>IKZF1</i>     | -3.164    | -18.607          |
| <i>TAS2R5</i>    | -2.056    | -8.751           |
| <i>LOC136242</i> | -2.034    | -8.674           |
| <i>SVOPL</i>     | -1.951    | -8.584           |
| <i>C7orf34</i>   | -1.901    | -8.577           |
| <i>FLJ36031</i>  | -1.944    | -8.177           |
| <i>GPR37</i>     | -1.931    | -8.107           |

**Supplementary Table 13. Associations between of B cell pathway lesions, *IKZF1* alterations and hematologic relapse, P9906 cohort**

|                                          | N   | Relapse<br>N | Competing<br>Risks<br>N | Cumulative Incidence (SE)% |         |
|------------------------------------------|-----|--------------|-------------------------|----------------------------|---------|
|                                          |     |              |                         | 5 year                     | P       |
| <b>Hematologic relapse</b>               |     |              |                         |                            |         |
| <b>B cell pathway</b>                    |     |              |                         |                            |         |
| No                                       | 74  | 9            | 9                       | 15.5 (5.7)                 | 0.072   |
| Yes                                      | 147 | 36           | 25                      | 30.8 (4.9)                 |         |
| <b>Number of B pathway lesions</b>       |     |              |                         |                            |         |
| N=0                                      | 67  | 9            | 7                       | 17.3 (6.4)                 | 0.026   |
| N=1                                      | 67  | 12           | 8                       | 23.1 (6.8)                 |         |
| N=2                                      | 52  | 10           | 8                       | 27.5 (8.9)                 |         |
| N>=3                                     | 35  | 14           | 11                      | 43.1 (9.4)                 |         |
| <b><i>IKZF1</i> deletion</b>             |     |              |                         |                            |         |
| No                                       | 158 | 20           | 21                      | 14.4 (3.2)                 | <0.0001 |
| Yes                                      | 63  | 25           | 13                      | 52.9 (8.5)                 |         |
| <b><i>IKZF1</i> deletion or mutation</b> |     |              |                         |                            |         |
| No                                       | 153 | 19           | 20                      | 14.0 (3.1)                 | <0.0001 |
| Yes                                      | 68  | 27           | 14                      | 55.2 (8.6)                 |         |
| <b>Any relapse</b>                       |     |              |                         |                            |         |
| <b>B cell pathway lesions</b>            |     |              |                         |                            |         |
| No                                       | 74  | 17           | 1                       | 26.6 (6.5)                 | 0.041   |
| Yes                                      | 147 | 58           | 3                       | 46.3 (5.1)                 |         |
| <b>Number of B pathway lesions</b>       |     |              |                         |                            |         |
| N=0                                      | 67  | 15           | 1                       | 26.6 (7.0)                 | <0.0001 |
| N=1                                      | 67  | 19           | 1                       | 33.6 (7.3)                 |         |
| N=2                                      | 52  | 17           | 1                       | 41.4 (9.4)                 |         |
| N>=3                                     | 35  | 24           | 1                       | 72.1 (8.7)                 |         |
| <b><i>IKZF1</i> deletion</b>             |     |              |                         |                            |         |
| No                                       | 158 | 38           | 3                       | 26.0 (3.8)                 | <0.0001 |
| Yes                                      | 63  | 37           | 1                       | 73.4(8.0)                  |         |
| <b><i>IKZF1</i> deletion or mutation</b> |     |              |                         |                            |         |
| No                                       | 153 | 36           | 3                       | 25.2 (3.8)                 | <0.0001 |
| Yes                                      | 68  | 38           | 1                       | 73.4 (8.0)                 |         |

**Supplementary Table 14. Kaplan-Meier estimates of EFS by B cell pathway or *IKZF1* lesions, P9906 cohort**

|                                          | N   | Any Relapse<br>or Death<br>N | Event-free survival (SE)% |         |
|------------------------------------------|-----|------------------------------|---------------------------|---------|
|                                          |     |                              | 5-Year                    | P       |
| <b>B cell pathway lesions</b>            |     |                              |                           |         |
| No                                       | 74  | 18                           | 72.0 (13.5)               | 0.037   |
| Yes                                      | 147 | 61                           | 51.6 (8.5)                |         |
| <b>Number of B cell pathway lesions</b>  |     |                              |                           |         |
| N=0                                      | 67  | 16                           | 71.9 (14.4)               | <0.0001 |
| N=1                                      | 67  | 20                           | 64.9 (10.7)               |         |
| N=2                                      | 52  | 18                           | 56.6 (16.7)               |         |
| N>=3                                     | 35  | 25                           | 25 (12.5)                 |         |
| <b><i>IKZF1</i> deletion</b>             |     |                              |                           |         |
| No                                       | 158 | 41                           | 72.0 (8.3)                | <0.0001 |
| Yes                                      | 63  | 38                           | 25.2 (9.7)                |         |
| <b><i>IKZF1</i> deletion or mutation</b> |     |                              |                           |         |
| No                                       | 153 | 40                           | 72.8 (8.3)                | <0.0001 |
| Yes                                      | 68  | 40                           | 25.9 (10.0)               |         |

**Supplementary Table 15. Hazard ratio estimates of B-cell pathway and *IKZF1* lesions on relapse and event free survival, P9906 cohort.**

Fine and Gray test, after adjustment for age, presentation leukocyte count and cytogenetic subtype.

|                                   | <b>Hazard Ratio (95% CI)</b> | <b>P</b> |
|-----------------------------------|------------------------------|----------|
| <b>Hematologic relapse</b>        |                              |          |
| B cell pathway lesions            | 1.86 (0.85-4.10)             | 0.12     |
| Number of B cell pathway lesions  | 1.59 (1.12-2.26)             | 0.010    |
| <i>IKZF1</i> deletion             | 4.05 (2.09-7.85)             | <0.0001  |
| <i>IKZF1</i> deletion or mutation | 4.07 (2.08-7.97)             | <0.0001  |
| <b>Any relapse</b>                |                              |          |
| B cell pathway lesion             | 2.08 (1.12-3.88)             | 0.021    |
| Number of B cell pathway lesions  | 1.82 (1.41-2.34)             | <0.0001  |
| <i>IKZF1</i> deletion             | 2.96 (1.78-4.94)             | <0.0001  |
| <i>IKZF1</i> deletion or mutation | 2.96 (1.74-4.81)             | <0.0001  |
| <b>Event free survival</b>        |                              |          |
| B cell pathway lesion             | 1.85 (1.07-3.19)             | 0.029    |
| Number of B cell pathway lesions  | 1.66 (1.32-2.10)             | <0.0001  |
| <i>IKZF1</i> deletion             | 2.78 (1.75-4.39)             | <0.0001  |
| <i>IKZF1</i> deletion or mutation | 2.70 (1.71-4.26)             | <0.0001  |

**Supplementary Table 16. Associations between genomic abnormalities and day 8 MRD, P9906 cohort.**

|                                          | Day 8 MRD N (%) |                |            | P-<br>Value |
|------------------------------------------|-----------------|----------------|------------|-------------|
|                                          | MRD≤0.01%       | 0.01%<MRD≤1.0% | MRD>1.0%   |             |
| <b><i>RBI</i></b>                        |                 |                |            |             |
| No                                       | 25 (14.79)      | 58 (34.32)     | 86 (50.89) | 0.14        |
| Yes                                      | 8 (29.63)       | 9 (33.33)      | 10 (37.04) |             |
| <b><i>EBF1</i></b>                       |                 |                |            |             |
| No                                       | 32 (17.78)      | 66 (36.67)     | 82 (45.56) | 0.0055      |
| Yes                                      | 1 (6.25)        | 1 (6.25)       | 14 (87.50) |             |
| <b><i>IKZF1</i> deletion</b>             |                 |                |            |             |
| No                                       | 27 (19.71)      | 50 (36.50)     | 60 (43.80) | 0.066       |
| Yes                                      | 6 (10.17)       | 17 (28.81)     | 36 (61.02) |             |
| <b><i>IKZF1</i> deletion or mutation</b> |                 |                |            |             |
| No                                       | 26 (19.55)      | 50 (37.59)     | 57 (42.86) | 0.041       |
| Yes                                      | 7 (11.11)       | 17 (26.98)     | 39 (61.90) |             |
| <b><i>PAX5</i> deletion or mutation</b>  |                 |                |            |             |
| No                                       | 14 (11.48)      | 39 (31.97)     | 69 (56.56) | 0.0076      |
| Yes                                      | 19 (25.68)      | 28 (37.84)     | 27 (36.49) |             |
| <b>Age group</b>                         |                 |                |            |             |
| 1<age≤10 years                           | 14 (21.21)      | 22 (33.33)     | 30 (45.45) | 0.50        |
| Age>10 years                             | 19 (14.62)      | 45 (34.62)     | 66 (50.77) |             |
| <b>WBC group</b>                         |                 |                |            |             |
| WBC< 50K                                 | 17 (17.35)      | 38 (38.78)     | 43 (43.88) | 0.32        |
| WBC≥50k                                  | 16 (16.33)      | 29 (29.59)     | 53 (54.08) |             |
| <b>Subtype</b>                           |                 |                |            |             |
| Hyperdiploid or <i>ETV6-RUNX1</i>        | 2 (40.00)       | 2 (40.00)      | 1 (20.00)  | 0.063       |
| <i>TCF3-PBX1</i>                         | 2 (9.52)        | 12 (57.14)     | 7 (33.33)  |             |
| <i>MLL</i> -rearranged                   | 4 (23.53)       | 8 (47.06)      | 5 (29.41)  |             |
| Others                                   | 25 (16.34)      | 45 (29.41)     | 83 (54.25) |             |
|                                          |                 |                |            |             |

**Supplementary Table 17. Associations between genetic lesions and day 29 MRD, P9906 cohort**

|                                   | Day 29 MRD; N (%) |                |            | P       |
|-----------------------------------|-------------------|----------------|------------|---------|
|                                   | MRD≤0.01%         | 0.01%<MRD≤1.0% | MRD>1.0%   |         |
| <b>1q gain</b>                    |                   |                |            |         |
| No                                | 113 (61.41)       | 46 (25.00)     | 25 (13.59) |         |
| Yes                               | 18 (90.00)        | 2 (10.00)      | 0 (0.00)   | 0.034   |
| <b>ABL1</b>                       |                   |                |            |         |
| No                                | 131 (65.17)       | 48 (23.88)     | 22 (10.95) |         |
| Yes                               | 0 (0.00)          | 0 (0.00)       | 3 (100.0)  | <0.0001 |
| <b>ADD3</b>                       |                   |                |            |         |
| No                                | 124 (66.67)       | 44 (23.66)     | 18 (9.68)  |         |
| Yes                               | 7 (38.89)         | 4 (22.22)      | 7 (38.89)  | 0.0012  |
| <b>BTLA/CD200</b>                 |                   |                |            |         |
| No                                | 127 (66.49)       | 44 (23.04)     | 20 (10.47) |         |
| Yes                               | 4 (30.77)         | 4 (30.77)      | 5 (38.46)  | 0.0052  |
| <b>C20orf94</b>                   |                   |                |            |         |
| No                                | 124 (66.31)       | 43 (22.99)     | 20 (10.70) |         |
| Yes                               | 7 (41.18)         | 5 (29.41)      | 5 (29.41)  | 0.044   |
| <b>EBF1</b>                       |                   |                |            |         |
| No                                | 129 (68.62)       | 40 (21.28)     | 19 (10.11) |         |
| Yes                               | 2 (12.50)         | 8 (50.00)      | 6 (37.50)  | <0.0001 |
| <b>IKZF1deletion</b>              |                   |                |            |         |
| No                                | 102 (71.83)       | 29 (20.42)     | 11 (7.75)  |         |
| Yes                               | 29 (46.77)        | 19 (30.65)     | 14 (22.58) | 0.0010  |
| <b>IKZF1 deletion or mutation</b> |                   |                |            |         |
| No                                | 100 (72.99)       | 28 (20.44)     | 9 (6.57)   |         |
| Yes                               | 31 (46.27)        | 20 (29.85)     | 16 (23.88) | 0.0001  |
| <b>PAX5 deletion</b>              |                   |                |            |         |
| No                                | 80 (58.39)        | 39 (28.47)     | 18 (13.14) |         |
| Yes                               | 51 (76.12)        | 9 (13.43)      | 7 (10.45)  | 0.034   |
| <b>PAX5 deletion or mutation</b>  |                   |                |            |         |
| No                                | 70 (55.56)        | 38 (30.16)     | 18 (14.29) |         |
| Yes                               | 61 (78.21)        | 10 (12.82)     | 7 (8.97)   | 0.0039  |
| <b>RAG1/2</b>                     |                   |                |            |         |
| No                                | 131 (66.16)       | 43 (21.72)     | 24 (12.12) |         |
| Yes                               | 0 (0.00)          | 5 (83.33)      | 1 (16.67)  | 0.0012  |
| <b>Age</b>                        |                   |                |            |         |
| 1<age≤10 years                    | 48 (73.85)        | 14 (21.54)     | 3 (4.62)   |         |
| Age>10 years                      | 83 (59.71)        | 34 (24.46)     | 22 (15.83) | 0.048   |
| <b>WCC</b>                        |                   |                |            |         |
| WBC< 50K                          | 67 (64.42)        | 27 (25.96)     | 10 (9.62)  |         |
| WBC≥50k                           | 64 (64.00)        | 21 (21.00)     | 15 (15.00) | 0.42    |
| <b>Subtype</b>                    |                   |                |            |         |
| Hyperdiploid or <i>ETV6-RUNX1</i> | 5 (83.33)         | 0 (0.00)       | 1 (16.67)  |         |
| <i>TCF3-PBX1</i>                  | 22 (100.0)        | 0 (0.00)       | 0 (0.00)   |         |
| <i>MLL</i> -rearranged            | 7 (43.75)         | 8 (50.00)      | 1 (6.25)   |         |
| Others                            | 97 (60.63)        | 40 (25.00)     | 23 (14.38) | 0.0015  |

**Supplementary Table 18. Association of genetic lesions with day 29 MRD adjusted by age, presentation leukocyte count and genetic subtype in the P9906 cohort. \*Other B-ALL (*ETV6-RUNX1*, *TCF3-PBX1*, hyperdiploid and normal/miscellaneous cases) v. *MLL*-rearranged ALL. WBC, presentation peripheral blood leukocyte count**

| <b>Lesion</b>                     | <b>factor</b>                                | <b>Odds Ratio (95%CI)</b> | <b>P</b> |
|-----------------------------------|----------------------------------------------|---------------------------|----------|
| 1q gain                           | WBC<50 vs. WBC≥50                            | 0.68 (0.36-1.29)          | 0.24     |
|                                   | age≤10yr vs. age>10yr                        | 0.36 (0.18-0.73)          | 0.0050   |
|                                   | Subtype*                                     | 0.61 (0.22-1.71)          | 0.35     |
|                                   | 1q gain present v. absent                    | 0.16 (0.03-0.71)          | 0.016    |
| <i>ABL1</i>                       | WBC<50 vs. WBC≥50                            | 0.75 (0.40-1.43)          | 0.39     |
|                                   | age≤10yr vs. age>10yr                        | 0.44 (0.21-0.89)          | 0.022    |
|                                   | Subtype*                                     | 0.50 (0.18-1.37)          | 0.18     |
|                                   | <i>ABL1</i> deletion present v. absent       | N/A                       | 0.98     |
| <i>ADD3</i>                       | WBC<50 vs. WBC≥50                            | 0.77 (0.41-1.45)          | 0.42     |
|                                   | age≤10yr vs. age>10yr                        | 0.41 (0.20-0.83)          | 0.013    |
|                                   | Subtype*                                     | 0.44 (0.16-1.24)          | 0.12     |
|                                   | <i>ADD3</i> deletion present v. absent       | 4.38 (1.73, 11.13)        | 0.0019   |
| <i>BTLA/CD200</i>                 | WBC<50 vs. WBC≥50                            | 0.78 (0.41-1.49)          | 0.45     |
|                                   | age≤10yr vs. age>10yr                        | 0.42 (0.21-0.87)          | 0.019    |
|                                   | Subtype*                                     | 0.46 (0.16-1.27)          | 0.13     |
|                                   | <i>BTLA/CD200</i> deletion present v. absent | 4.87 (1.64, 14.45)        | 0.0044   |
| <i>C20orf94</i>                   | WBC<50 vs. WBC≥50                            | 0.74 (0.39-1.39)          | 0.35     |
|                                   | age≤10yr vs. age>10yr                        | 0.43 (0.21-0.87)          | 0.019    |
|                                   | Subtype*                                     | 0.48 (0.17-1.32)          | 0.16     |
|                                   | <i>C20orf94</i> deletion present v. absent   | 2.87 (1.11-7.44)          | 0.030    |
| <i>EBF1</i>                       | WBC<50 vs. WBC≥50                            | 0.61 (0.32-1.16)          | 0.13     |
|                                   | age≤10yr vs. age>10yr                        | 0.37 (0.18-0.76)          | 0.0069   |
|                                   | Subtype*                                     | 0.43 (0.15-1.20)          | 0.11     |
|                                   | <i>EBF1</i> deletion present v. absent       | 8.98 (3.27, 24.61)        | <0.0001  |
| <i>IKZF1</i> deletion             | WBC<50 vs. WBC≥50                            | 0.72 (0.38-1.38)          | 0.33     |
|                                   | age≤10yr vs. age>10yr                        | 0.40 (0.19-0.82)          | 0.013    |
|                                   | Subtype*                                     | 0.35 (0.12-1.00)          | 0.050    |
|                                   | <i>IKZF1</i> deletion present v. absent      | 3.41 (1.84-6.33)          | 0.0001   |
| <i>IKZF1</i> deletion or mutation | WBC<50 vs. WBC≥50                            | 0.72 (0.38-1.39)          | 0.33     |
|                                   | age≤10yr vs. age>10yr                        | 0.41 (0.20-0.84)          | 0.016    |
|                                   | Subtype*                                     | 0.35 (0.12-1.00)          | 0.05     |
|                                   | <i>IKZF1</i> alteration present v. absent    | 3.71 (2.02-6.84)          | <0.0001  |
| <i>PAX5</i> deletion              | WBC<50 vs. WBC≥50                            | 0.70 (0.37-1.31)          | 0.26     |
|                                   | age≤10yr vs. age>10yr                        | 0.42 (0.21-0.85)          | 0.016    |
|                                   | Subtype*                                     | 0.65 (0.23-1.83)          | 0.41     |
|                                   | <i>PAX5</i> deletion present v. absent       | 0.53 (0.28-1.03)          | 0.06     |
| <i>PAX5</i> deletion or mutation  | WBC<50 vs. WBC≥50                            | 0.70 (0.37-1.31)          | 0.26     |
|                                   | age≤10yr vs. age>10yr                        | 0.42 (0.21-0.85)          | 0.016    |
|                                   | Subtype*                                     | 0.65 (0.23-1.83)          | 0.41     |
|                                   | <i>PAX5</i> alteration present v. absent     | 0.53 (0.28-1.03)          | 0.060    |
| <i>RAG1/2</i>                     | WBC<50 vs. WBC≥50                            | 0.65 (0.35-1.23)          | 0.18     |
|                                   | age≤10yr vs. age>10yr                        | 0.40 (0.19-0.81)          | 0.011    |
|                                   | Subtype*                                     | 0.51 (0.18-1.40)          | 0.19     |
|                                   | <i>RAG1/2</i> deletion present v. absent     | 5.51 (1.20, 25.39)        | 0.029    |

**Supplementary Table 19. Multivariable analysis of associations between *IKZF1* deletion/mutation and outcome (isolated or combined hematologic relapse, any relapse, or any event) in the P9906 cohort adjusting for age, presentation leukocyte count, leukemia subtype, and day 8 or day 29 MRD level**

\*Other B-ALL (*ETV6-RUNX1*, *TCF3-PBX1*, hyperdiploid, normal/miscellaneous ALL cases) v. *MLL*-rearranged. No association between sex or race (white, black, other), thus these variables were not included in the multivariable model. †As there was no event for day 8 MRD<0.01%, this analysis could not be performed for day 8 MRD and relapse.

| <b>Outcomes/Factors</b>                                  | <b>Hazard Ratio<br/>(95% CI)</b> | <b>P</b> |
|----------------------------------------------------------|----------------------------------|----------|
| <b>Hematological Relapse (adjusting for day 29 MRD)†</b> |                                  |          |
| age>10yr vs. age≤10yr                                    | 0.67 (0.25-1.72)                 | 0.40     |
| Subtype*                                                 | 1.27 (0.29-5.59)                 | 0.75     |
| WBC≥50K vs. WBC<50K                                      | 0.79 (0.38-1.63)                 | 0.52     |
| 0.01%<D29MRD≤1.0% vs. D29MRD≤0.01%                       | 4.50 (2.05-9.86)                 | 0.0002   |
| D29MRD>1.0% vs. D29MRD≤0.01%                             | 5.46 (2.39-12.50)                | 0.0001   |
| <i>IKZF1</i> alteration present vs. absent               | 2.87 (1.35-6.09)                 | 0.0062   |
| <b>Any Relapse (adjusting for day 29 MRD)†</b>           |                                  |          |
| age>10yr vs. age≤10yr                                    | 0.79 (0.43-1.47)                 | 0.46     |
| Subtype*                                                 | 1.10 (0.37-3.23)                 | 0.86     |
| WBC≥50K vs. WBC<50K                                      | 1.21 (0.72-2.04)                 | 0.47     |
| 0.01%<D29MRD≤1.0% vs. D29MRD≤0.01%                       | 2.33 (1.31-4.15)                 | 0.0041   |
| D29MRD>1.0% vs. D29MRD≤0.01%                             | 2.55 (1.34-4.85)                 | 0.0044   |
| <i>IKZF1</i> alteration present vs. absent               | 2.40 (1.370-4.20)                | 0.0021   |
| <b>Any Event (adjusting for day 8 MRD)</b>               |                                  |          |
| age>10yr vs. age≤10yr                                    | 1.05 (0.58-1.87)                 | 0.88     |
| Subtype*                                                 | 1.34 (0.52-3.48)                 | 0.54     |
| WBC≥50K vs. WBC<50K                                      | 1.30 (0.75-2.26)                 | 0.35     |
| 0.01%<D8MRD≤1.0% vs. D8MRD≤0.01%                         | 1.33 (0.52-3.41)                 | 0.55     |
| D8MRD>1.0% vs. D8MRD≤0.01%                               | 2.62 (1.09-6.26)                 | 0.031    |
| <i>IKZF1</i> alteration present vs. absent               | 2.71 (1.65-4.45)                 | <0.0001  |
| <b>Any Event (adjusting for day 29 MRD)</b>              |                                  |          |
| age>10yr vs. age≤10yr                                    | 0.85 (0.48-1.50)                 | 0.57     |
| Subtype*                                                 | 1.07 (0.43-2.64)                 | 0.89     |
| WBC≥50K vs. WBC<50K                                      | 1.34 (0.79-2.27)                 | 0.27     |
| 0.01%<D29MRD≤1.0% vs. D29MRD≤0.01%                       | 2.57 (1.49-4.43)                 | 0.0007   |
| D29MRD>1.0% vs. D29MRD≤0.01%                             | 3.17 (1.66-6.05)                 | 0.0005   |
| <i>IKZF1</i> alteration present vs. absent               | 1.93 (1.17-3.18)                 | 0.010    |

**Supplementary Table 20. Cumulative incidence of isolated or combined hematologic relapse by genetic lesions, St Jude cohort with MRD data (N=160).**

\*Stratified according to treatment protocol: Total XIII intermediate to high risk N=23, Total XIII low risk N=28, Total XIV and XV standard and high risk N=50, total XV low risk N=59.

| Lesion               | Sub N | Hematologic relapse<br>N | Competing Risks<br>N | Cumulative Incidence (SE)% |                            |                           |
|----------------------|-------|--------------------------|----------------------|----------------------------|----------------------------|---------------------------|
|                      |       |                          |                      | 5-Year                     | P Unstratified Gray's Test | P Stratified Gray's Test* |
| <b><i>RAG1/2</i></b> |       |                          |                      |                            |                            |                           |
| No                   | 150   | 17                       | 6                    | 10.4 (2.7)                 |                            |                           |
| Yes                  | 10    | 2                        | 0                    | 25.0 (17.2)                | 0.32                       | 0.050                     |
| <b><i>ATM1</i></b>   |       |                          |                      |                            |                            |                           |
| No                   | 158   | 18                       | 6                    | 10.7 (2.7)                 |                            |                           |
| Yes                  | 2     | 1                        | 0                    | NA                         | 0.022                      | 0.008                     |
| <b><i>KRAS</i></b>   |       |                          |                      |                            |                            |                           |
| No                   | 147   | 15                       | 6                    | 9.8 (2.6)                  |                            |                           |
| Yes                  | 13    | 4                        | 0                    | 30.8 (16.9)                | 0.015                      | 0.013                     |
| <b><i>IKZF1</i></b>  |       |                          |                      |                            |                            |                           |
| No                   | 139   | 12                       | 4                    | 8.4 (2.6)                  |                            |                           |
| Yes                  | 21    | 7                        | 2                    | 29.4 (10.5)                | 0.001                      | 0.039                     |

**Supplementary Table 21. Cumulative incidence of hematologic relapse by genetic lesions, St Jude cohort with MRD data, excluding BCR-ABL1 positive ALL (N=151).**

\*Stratified according to treatment protocol: Total XIII intermediate to high risk N=20, Total XIII low risk N=28, Total XIV and XV standard and high risk N=44, total XV low risk N=59.

| <b>Lesion</b>        | <b>N</b> | <b>Hematologic relapse N</b> | <b>competing Risks N</b> | <b>Cumulative Incidence (SE)%</b> |                                   |                                 |
|----------------------|----------|------------------------------|--------------------------|-----------------------------------|-----------------------------------|---------------------------------|
|                      |          |                              |                          | <b>5-Year</b>                     | <b>P Unstratified Gray's Test</b> | <b>P Stratified Gray's Test</b> |
| <b><i>RAG1/2</i></b> |          |                              |                          |                                   |                                   |                                 |
| No                   | 141      | 12                           | 5                        | 7.1 (2.4)                         |                                   |                                 |
| Yes                  | 10       | 2                            | 0                        | 25.0 (17.2)                       | 0.157                             | 0.032                           |
| <b><i>KRAS</i></b>   |          |                              |                          |                                   |                                   |                                 |
| No                   | 138      | 10                           | 5                        | 6.5 (2.3)                         |                                   |                                 |
| Yes                  | 13       | 4                            | 0                        | 30.8 (16.9)                       | 0.002                             | 0.002                           |
| <b><i>IKZF1</i></b>  |          |                              |                          |                                   |                                   |                                 |
| No                   | 136      | 10                           | 4                        | 6.8 (2.4)                         |                                   |                                 |
| Yes                  | 15       | 4                            | 1                        | 20.6 (11.1)                       | 0.022                             | 0.11                            |

**Supplementary Table 22. Associations of genetic lesions and day 19 MRD, St Jude cohort (all B-progenitor ALL cases)**

| Lesion                  | Day 19 MRD N (%)        |                              |                        | P       |
|-------------------------|-------------------------|------------------------------|------------------------|---------|
|                         | MRD<0.01%<br>71 (44.1%) | 0.01%≤MRD<1.0%<br>64 (39.8%) | MRD≥1.0%<br>26 (16.2%) |         |
| <b><i>ATP10A</i></b>    |                         |                              |                        |         |
| No                      | 71 (44.94)              | 63 (39.87)                   | 24 (15.19)             | 0.035   |
| Yes                     | 0 (0.00)                | 1 (33.33)                    | 2 (66.67)              |         |
| <b><i>ARPP-21</i></b>   |                         |                              |                        |         |
| No                      | 70 (45.45)              | 62 (40.26)                   | 22 (14.29)             | 0.01    |
| Yes                     | 1 (14.29)               | 2 (28.57)                    | 4 (57.14)              |         |
| <b><i>GAB1</i></b>      |                         |                              |                        |         |
| No                      | 71 (45.22)              | 63 (40.13)                   | 23 (14.65)             | 0.0064  |
| Yes                     | 0 (0.00)                | 1 (25.00)                    | 3 (75.00)              |         |
| <b><i>HIST1H2BE</i></b> |                         |                              |                        |         |
| No                      | 68 (46.26)              | 59 (40.14)                   | 20 (13.61)             | 0.013   |
| Yes                     | 3 (21.43)               | 5 (35.71)                    | 6 (42.86)              |         |
| <b><i>IKZF1</i></b>     |                         |                              |                        |         |
| No                      | 69 (49.29)              | 58 (41.43)                   | 13 (9.29)              | <0.0001 |
| Yes                     | 2 (9.52)                | 6 (28.57)                    | 13 (61.90)             |         |
| <b><i>CDK6</i></b>      |                         |                              |                        |         |
| No                      | 71 (45.81)              | 63 (40.65)                   | 21 (13.55)             | 0.0003  |
| Yes                     | 0 (0.00)                | 1 (16.67)                    | 5 (83.33)              |         |
| <b><i>ABL1</i></b>      |                         |                              |                        |         |
| No                      | 71 (44.94)              | 64 (40.51)                   | 23 (14.56)             | 0.0040  |
| Yes                     | 0 (0.00)                | 0 (0.00)                     | 3 (100.0)              |         |

**Supplementary Table 23. Associations of genetic lesions and day 46 MRD, St Jude cohort (all B-progenitor ALL cases with MRD data, N=160)**

| Lesion Loci                            | Day 46 MRD N (%)         |                              |                    | P       |
|----------------------------------------|--------------------------|------------------------------|--------------------|---------|
|                                        | MRD<0.01%<br>126 (78.8%) | 0.01%≤MRD<1.0%<br>26 (16.3%) | MRD≥1.0%<br>8 (5%) |         |
| <b><i>NFI</i></b>                      |                          |                              |                    |         |
| No                                     | 123 (80.39)              | 22 (14.38)                   | 8 (5.23)           | 0.043   |
| Yes                                    | 3 (42.86)                | 4 (57.14)                    | 0 (0.00)           |         |
| <b><i>EBF1</i></b>                     |                          |                              |                    |         |
| No                                     | 122 (80.79)              | 23 (15.23)                   | 6 (3.97)           | 0.021   |
| Yes                                    | 4 (44.44)                | 3 (33.33)                    | 2 (22.22)          |         |
| <b>6p22 Histone cluster</b>            |                          |                              |                    |         |
| No                                     | 120 (82.19)              | 21 (14.38)                   | 5 (3.42)           | 0.0030  |
| Yes                                    | 6 (42.86)                | 5 (35.71)                    | 3 (21.43)          |         |
| <b><i>HBS1L</i> (5' of <i>MYB</i>)</b> |                          |                              |                    |         |
| No                                     | 119 (78.81)              | 26 (17.22)                   | 6 (3.97)           | 0.038   |
| Yes                                    | 7 (77.78)                | 0 (0.00)                     | 2 (22.22)          |         |
| <b><i>IKZF1</i></b>                    |                          |                              |                    |         |
| No                                     | 119 (85.61)              | 19 (13.67)                   | 1 (0.72)           | <0.0001 |
| Yes                                    | 7 (33.33)                | 7 (33.33)                    | 7 (33.33)          |         |
| <b><i>CDKN6</i></b>                    |                          |                              |                    |         |
| No                                     | 125 (81.17)              | 23 (14.94)                   | 6 (3.90)           | 0.0034  |
| Yes                                    | 1 (16.67)                | 3 (50.00)                    | 2 (33.33)          |         |
| <b><i>ABL</i></b>                      |                          |                              |                    |         |
| No                                     | 126 (80.25)              | 25 (15.92)                   | 6 (3.82)           | 0.0015  |
| Yes                                    | 0 (0.00)                 | 1 (33.33)                    | 2 (66.67)          |         |

**Supplementary Table 24. Associations of genetic lesions and day 19 MRD, St Jude cohort (B-progenitor ALL cases, excluding *BCR-ABL1* ALL)**

| Lesion Loci           | Day 19 MRD N (%)        |                              |                       | P      |
|-----------------------|-------------------------|------------------------------|-----------------------|--------|
|                       | MRD<0.01%<br>71 (46.4%) | 0.01%≤MRD<1.0%<br>61 (39.9%) | MRD≥1.0%<br>8 (38.1%) |        |
| <b><i>ATP10A</i></b>  |                         |                              |                       |        |
| No                    | 71 (47.33)              | 60 (40.00)                   | 19 (12.67)            | 0.023  |
| Yes                   | 0 (0.00)                | 1 (33.33)                    | 2 (66.67)             |        |
| <b><i>ARPP-21</i></b> |                         |                              |                       |        |
| No                    | 70 (47.62)              | 59 (40.14)                   | 18 (12.24)            | 0.027  |
| Yes                   | 1 (16.67)               | 2 (33.33)                    | 3 (50.00)             |        |
| <b><i>GABI</i></b>    |                         |                              |                       |        |
| No                    | 71 (47.65)              | 60 (40.27)                   | 18 (12.08)            | 0.0041 |
| Yes                   | 0 (0.00)                | 1 (25.00)                    | 3 (75.00)             |        |
| <b><i>IKZF1</i></b>   |                         |                              |                       |        |
| No                    | 69 (50.00)              | 56 (40.58)                   | 13 (9.42)             | 0.0001 |
| Yes                   | 2 (13.33)               | 5 (33.33)                    | 8 (53.33)             |        |
| <b><i>CDK6</i></b>    |                         |                              |                       |        |
| No                    | 71 (47.97)              | 60 (40.54)                   | 17 (11.49)            | 0.0007 |
| Yes                   | 0 (0.00)                | 1 (20.00)                    | 4 (80.00)             |        |

**Supplementary Table 25. Associations of genetic lesions and day 46 MRD, St Jude cohort (B-progenitor ALL cases, excluding *BCR-ABL1* ALL)**

| Lesion               | Day 46 MRD N (%)         |                              |                      | P      |
|----------------------|--------------------------|------------------------------|----------------------|--------|
|                      | MRD<0.01%<br>124 (82.2%) | 0.01%≤MRD<1.0%<br>23 (15.2%) | MRD≥1.0%<br>4 (2.6%) |        |
| <b><i>NFI</i></b>    |                          |                              |                      |        |
| No                   | 121 (84.03)              | 19 (13.19)                   | 4 (2.78)             | 0.024  |
| Yes                  | 3 (42.86)                | 4 (57.14)                    | 0 (0.00)             |        |
| <b><i>IKZF1</i></b>  |                          |                              |                      |        |
| No                   | 117 (86.03)              | 18 (13.24)                   | 1 (0.74)             | 0.0001 |
| Yes                  | 7 (46.67)                | 5 (33.33)                    | 3 (20.00)            |        |
| <b><i>CDK6</i></b>   |                          |                              |                      |        |
| No                   | 123 (84.25)              | 20 (13.70)                   | 3 (2.05)             | 0.0096 |
| Yes                  | 1 (20.00)                | 3 (60.00)                    | 1 (20.00)            |        |
| <b><i>CCDC26</i></b> |                          |                              |                      |        |
| No                   | 124 (82.67)              | 23 (15.33)                   | 3 (2.00)             | 0.030  |
| Yes                  | 0 (0.00)                 | 0 (0.00)                     | 1 (100.0)            |        |

**Supplementary Table 26. Genes driving positive enrichment of hematopoietic stem/progenitor gene set in P9906 high-risk ALL.**

| Gene             | Running enrichment score | Core enrichment |
|------------------|--------------------------|-----------------|
| <i>GIMAP6</i>    | 0.0992                   | YES             |
| <i>CD52</i>      | 0.178                    | YES             |
| <i>CLEC2B</i>    | 0.254                    | YES             |
| <i>NRIP1</i>     | 0.305                    | YES             |
| <i>CRHBP</i>     | 0.36                     | YES             |
| <i>HIF0</i>      | 0.415                    | YES             |
| <i>MMRN1</i>     | 0.448                    | YES             |
| <i>ZFAND3</i>    | 0.478                    | YES             |
| <i>TIPARP</i>    | 0.516                    | YES             |
| <i>MLLT3</i>     | 0.53                     | YES             |
| <i>SPINK2</i>    | 0.55                     | YES             |
| <i>ROBO4</i>     | 0.572                    | YES             |
| <i>GUCY1B3</i>   | 0.602                    | YES             |
| <i>HOXB6</i>     | 0.61                     | YES             |
| <i>BST2</i>      | 0.627                    | YES             |
| <i>COX6B1</i>    | 0.577                    | NO              |
| <i>HIST1H1C</i>  | 0.586                    | NO              |
| <i>MPL</i>       | 0.561                    | NO              |
| <i>GPC5</i>      | 0.555                    | NO              |
| <i>CYBRD1</i>    | 0.516                    | NO              |
| <i>GUCY1A3</i>   | 0.503                    | NO              |
| <i>KLF2</i>      | 0.504                    | NO              |
| <i>HIST1H2BG</i> | 0.447                    | NO              |
| <i>HIST1H2AE</i> | 0.355                    | NO              |
| <i>RHOQ</i>      | 0.345                    | NO              |
| <i>NPR3</i>      | 0.335                    | NO              |
| <i>HLA-E</i>     | 0.315                    | NO              |
| <i>C5ORF23</i>   | 0.308                    | NO              |
| <i>C4ORF18</i>   | 0.278                    | NO              |
| <i>HOXB3</i>     | 0.278                    | NO              |
| <i>TEAD2</i>     | 0.194                    | NO              |
| <i>PGM5</i>      | 0.2                      | NO              |
| <i>PCDH9</i>     | 0.148                    | NO              |
| <i>BIRC3</i>     | 0.158                    | NO              |
| <i>ATP8B4</i>    | 0.0388                   | NO              |

**Supplementary Table 27. Genes driving negative enrichment of the B-cell signal transduction gene set in P9906 high-risk ALL.**

| Gene            | Running enrichment score | Core enrichment |
|-----------------|--------------------------|-----------------|
| <i>AKT1</i>     | 0.0279                   | YES             |
| <i>AKT2</i>     | -0.021                   | YES             |
| <i>LYN</i>      | -0.0703                  | YES             |
| <i>PIK3R1</i>   | -0.115                   | YES             |
| <i>BTK</i>      | -0.15                    | YES             |
| <i>ITPKB</i>    | -0.192                   | YES             |
| <i>SYK</i>      | -0.234                   | YES             |
| <i>CD19</i>     | -0.268                   | YES             |
| <i>NFKBIB</i>   | -0.3                     | YES             |
| <i>NFKB2</i>    | -0.336                   | YES             |
| <i>GRB2</i>     | -0.372                   | YES             |
| <i>PLCG2</i>    | -0.406                   | YES             |
| <i>SHC1</i>     | -0.43                    | YES             |
| <i>RAF1</i>     | -0.46                    | YES             |
| <i>NFKB1</i>    | -0.466                   | YES             |
| <i>SOS2</i>     | -0.436                   | NO              |
| <i>AKT3</i>     | -0.438                   | NO              |
| <i>DAG1</i>     | -0.456                   | NO              |
| <i>PPP1R13B</i> | -0.47                    | NO              |
| <i>PIK3CD</i>   | -0.451                   | NO              |
| <i>SOS1</i>     | -0.394                   | NO              |
| <i>VAV1</i>     | -0.36                    | NO              |
| <i>NFKBIL2</i>  | -0.362                   | NO              |
| <i>MAPK1</i>    | -0.274                   | NO              |
| <i>NFKBIE</i>   | -0.247                   | NO              |
| <i>MAP2K1</i>   | -0.25                    | NO              |
| <i>EPHB2</i>    | -0.184                   | NO              |
| <i>PIK3CA</i>   | -0.175                   | NO              |
| <i>NFAT5</i>    | -0.154                   | NO              |
| <i>BCR</i>      | -0.153                   | NO              |
| <i>BAD</i>      | -0.162                   | NO              |
| <i>SERPINA4</i> | -0.1                     | NO              |
| <i>PI3</i>      | -0.0799                  | NO              |
| <i>MAP2K2</i>   | -0.00261                 | NO              |
| <i>ITPKA</i>    | -0.00194                 | NO              |
| <i>NFKBIL1</i>  | -0.0269                  | NO              |
| <i>BLNK</i>     | -0.0225                  | NO              |
| <i>NFKBIA</i>   | -0.0533                  | NO              |
| <i>CSK</i>      | -0.0845                  | NO              |

### Supplementary Figure 1. *PAX5* deletions in P9906 ALL.

Raw log ratio copy number at the *PAX5* locus is shown for all cases with an *IKZF1* CNA. Blue is deletion, and red gain. HD, hyperdiploid.

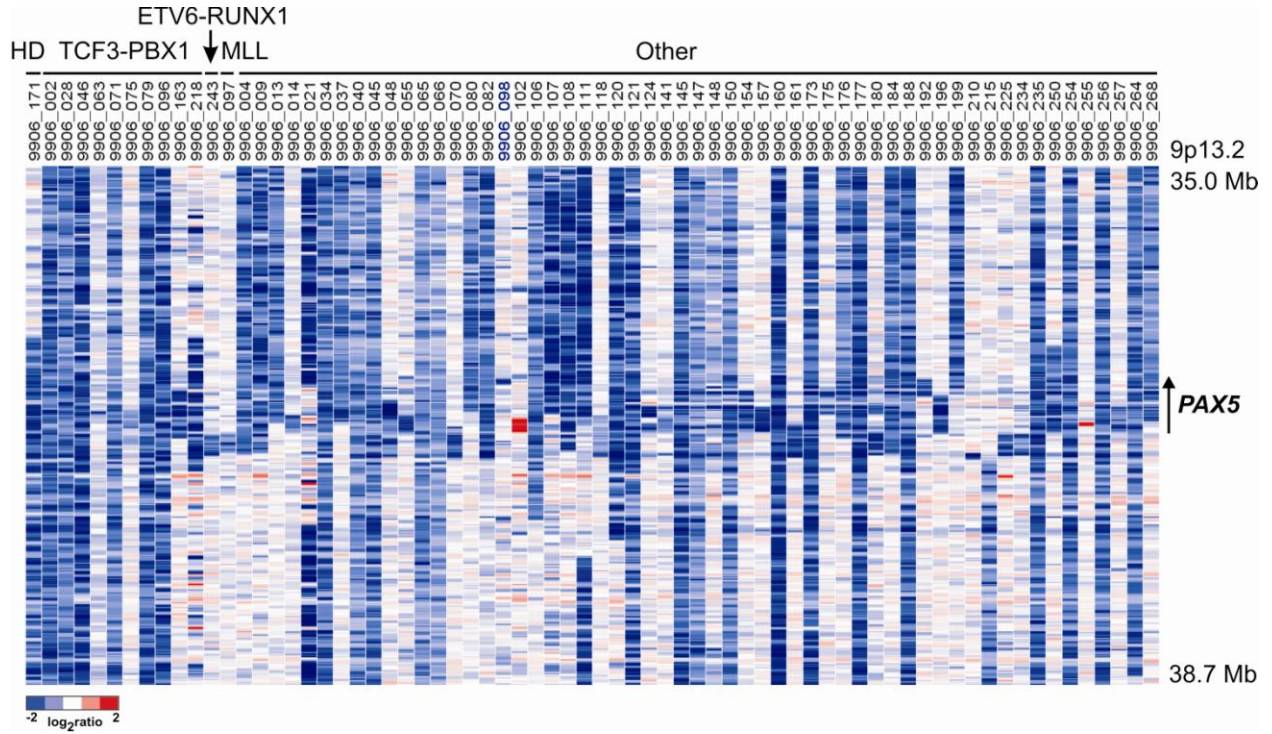

**Supplementary Figure 2. *IKZF1* deletions in P9906 ALL.**

Raw log ratio copy number at the *IKZF1* locus is shown for all cases with an *IKZF1* CNA.

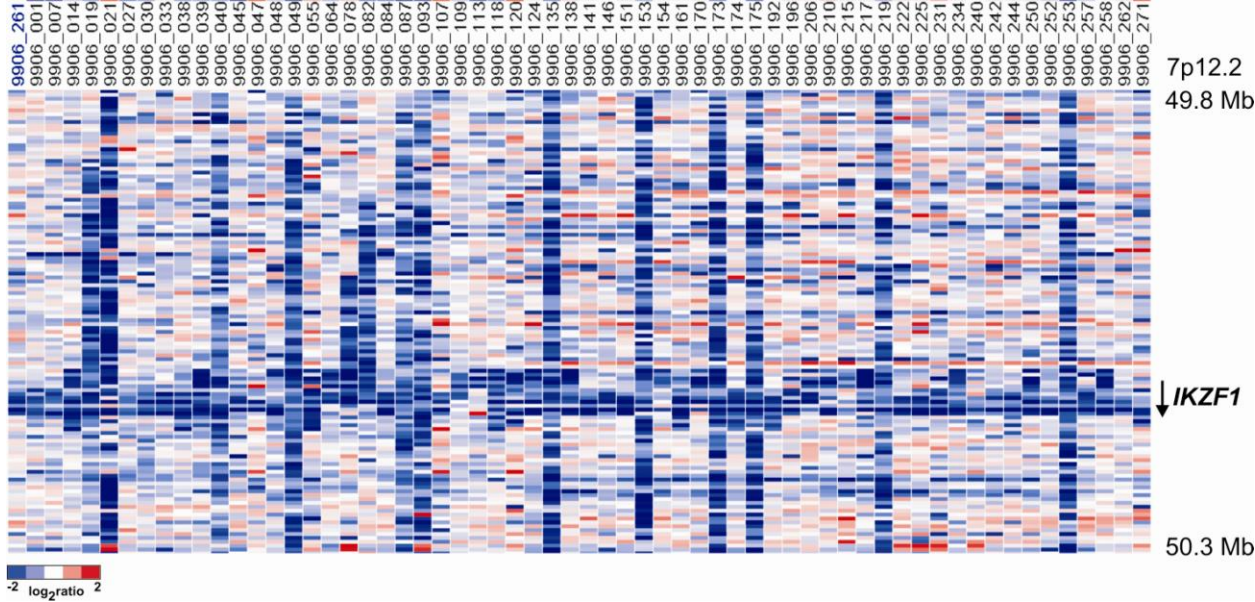

### Supplementary Figure 3. Gene set enrichment analysis (GSEA) of poor outcome P9906 ALL, poor outcome St Jude ALL, and *BCR-ABL1* positive St Jude ALL.

**A**, Genes are ranked (bottom of panel, green) based on correlation between expression and class distinction (here SPC predicted poor outcome v non-poor outcome). GSEA then determines if the members of a gene set (here a gene set of the top 100 upregulated genes in St Jude poor outcome ALL) are randomly distributed in the ranked gene list, or primarily found at the top or bottom. Occurrences of members of the gene set in the ranked gene list are shown as vertical black lines above the ranked signature. An enrichment score *ES* is calculated that reflects the degree to which a gene set is overrepresented at the top or bottom of the entire ranked list. The *ES* is a running sum, Kolmogorov-Smirnov-like statistic calculated by walking down list *L* and increasing the statistic when a gene in *S* is encountered, and decreasing it when it is not. The magnitude of the increment depends on the strength of association with phenotype, and the *ES* is the maximum deviation from zero encountered in the random walk, and is depicted as a red curve. The "leading edge" genes are those members of the gene set responsible for the observed enrichment, and are those hits occurring to the left of the vertical dotted red line. The significance level of *ES* is calculated by phenotype-based permutation testing, and when a database of gene sets are evaluated, as in this analysis, the significance level is adjusted for multiple hypothesis testing by calculation of a false discovery rate (FDR). Here there is highly significant enrichment of the St Jude poor outcome upregulated gene set in the P9906 poor outcome signature. **B**, enrichment of the P9906 poor outcome upregulated gene set in the St Jude poor outcome signature. These analyses demonstrate similarity between the signatures of P9906 and St Jude poor outcome ALL. **C**, enrichment of the P9906 poor outcome upregulated gene set in St Jude *BCR-ABL1* positive ALL, demonstrating similarity of P9906 poor outcome (*BCR-ABL1* negative) and St Jude *BCR-ABL1* positive signatures. **D**, heatmap of St Jude ALL and P9906 poor outcome upregulated genes, corresponding to the GSEA plot in C. B-A, *BCR-ABL1* positive; E-R, *ETV6-RUNX1* positive; H50, high hyperdiploid; Hypo, hypodiploid; T-P, *TCF3-PBX1*. Increased expression genes of the P9906 poor outcome gene set is seen in *BCR-ABL1* ALL; "leading edge" genes responsible for the enrichment are shown at the right of the panel. **E**, positive enrichment of genes upregulated in human hematopoietic stem cells (CD34+/CD38-/Lin- cells from bone marrow, umbilical cord blood and peripheral blood stem-prognitor cells compared to the stem cell-depleted populations)<sup>37</sup> in poor outcome P9906 ALL. Positive enrichment of this gene set in was also observed in poor outcome St Jude ALL (P=0.0023, FDR=0.03). **F**, negative enrichment of B cell antigen receptor/signal transduction genes ([http://stke.sciencemag.org/cgi/cm/stkecm;CMP\\_6909](http://stke.sciencemag.org/cgi/cm/stkecm;CMP_6909))<sup>38</sup> in P9906 poor outcome ALL. The ranked gene list compares high risk cases that relapse to low risk cases that do not relapse.

**A**

Ranked gene list: P9906 poor outcome  
Gene set: St Jude poor outcome upregulated

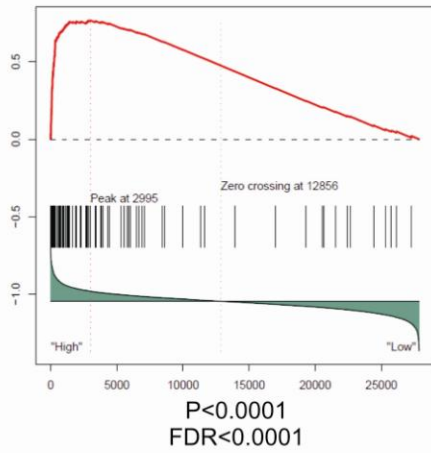**B**

Ranked gene list: St Jude poor outcome  
Gene set: P9906 poor outcome upregulated

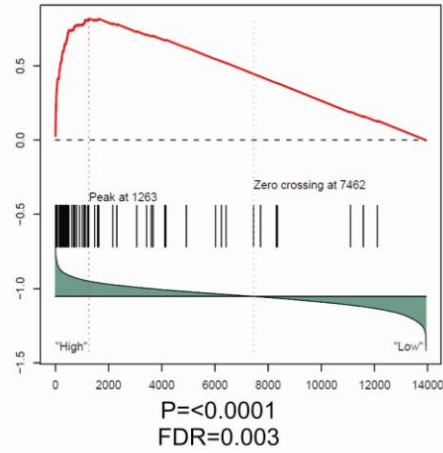**C**

Ranked gene list: St Jude *BCR-ABL1*+ ALL  
Gene set: P9906 poor outcome upregulated

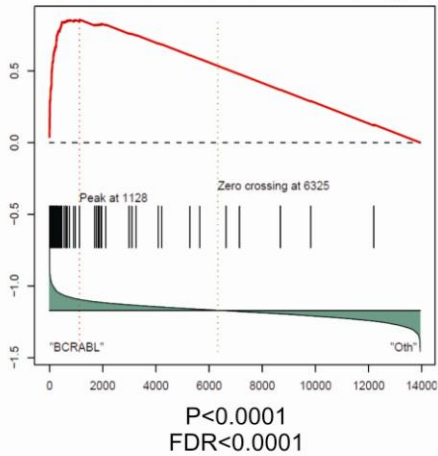**D**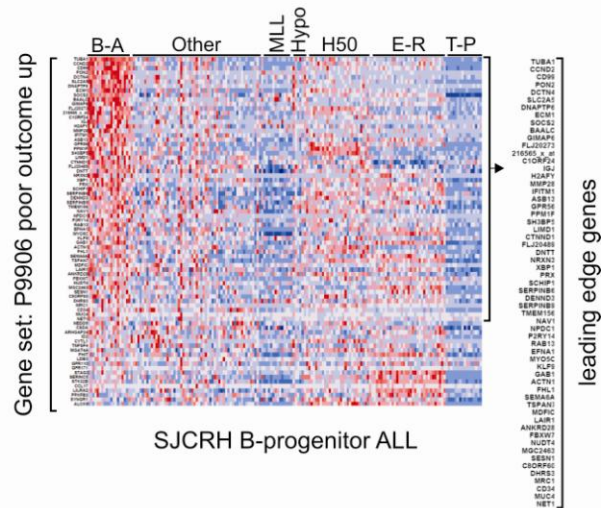**E**

Ranked gene list: P9906 poor outcome  
Gene set: Hematopoietic stem cell

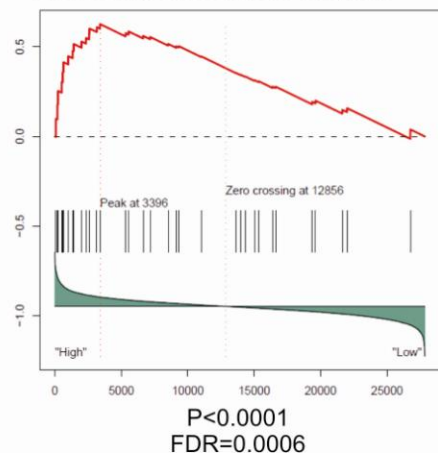**F**

Ranked gene list: P9906 poor outcome  
Gene set: ST\_B\_cell\_antigen\_receptor

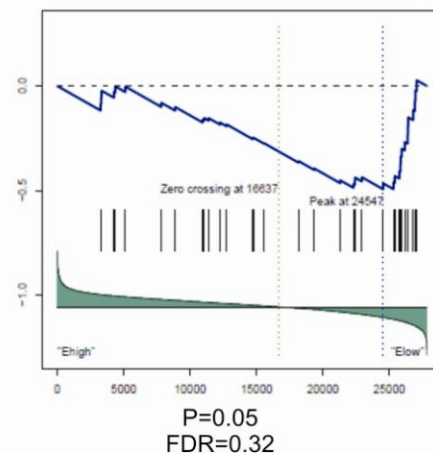

## REFERENCES

1. Nachman JB, Sather HN, Sensel MG, et al. Augmented post-induction therapy for children with high-risk acute lymphoblastic leukemia and a slow response to initial therapy. *N Engl J Med* 1998;338:1663-71.
2. Shuster JJ, Camitta BM, Pullen J, et al. Identification of newly diagnosed children with acute lymphocytic leukemia at high risk for relapse. *Cancer Res Ther and Control* 1999;9:101-7.
3. Mullighan CG, Goorha S, Radtke I, et al. Genome-wide analysis of genetic alterations in acute lymphoblastic leukaemia. *Nature* 2007;446:758-64.
4. Mullighan CG, Miller CB, Radtke I, et al. BCR-ABL1 lymphoblastic leukaemia is characterized by the deletion of Ikaros. *Nature* 2008;453:110-4.
5. Pui CH, Boyett JM, Rivera GK, et al. Long-term results of Total Therapy studies 11, 12 and 13A for childhood acute lymphoblastic leukemia at St Jude Children's Research Hospital. *Leukemia* 2000;14:2286-94.
6. Pui CH, Sandlund JT, Pei D, et al. Improved outcome for children with acute lymphoblastic leukemia: results of Total Therapy Study XIII B at St Jude Children's Research Hospital. *Blood* 2004;104:2690-6.
7. Kishi S, Griener J, Cheng C, et al. Homocysteine, pharmacogenetics, and neurotoxicity in children with leukemia. *J Clin Oncol* 2003;21:3084-91.
8. Pui CH, Relling MV, Sandlund JT, Downing JR, Campana D, Evans WE. Total Therapy study XV for newly diagnosed childhood acute lymphoblastic leukemia: study design and preliminary results. *Ann Hematol* 2006;85 Suppl 1:88-91.
9. Pieters R, Schrappe M, De Lorenzo P, et al. A treatment protocol for infants younger than 1 year with acute lymphoblastic leukaemia (Interfant-99): an observational study and a multicentre randomised trial. *Lancet* 2007;370:240-50.
10. Lin M, Wei LJ, Sellers WR, Lieberfarb M, Wong WH, Li C. dChipSNP: significance curve and clustering of SNP-array-based loss-of-heterozygosity data. *Bioinformatics* 2004;20:1233-40.
11. Pounds SB, Cheng C, Mullighan CG, Raimondi SC, Shurtleff SA, Downing JR. Reference Alignment of SNP Microarray Signals for Copy Number Analysis of Tumors. *Bioinformatics* 2008; doi:10.1093/bioinformatics/btn624.
12. Venkatraman ES, Olshen AB. A faster circular binary segmentation algorithm for the analysis of array CGH data. *Bioinformatics* 2007;23:657-63.
13. Ewing B, Hillier L, Wendl MC, Green P. Base-calling of automated sequencer traces using phred. I. Accuracy assessment. *Genome Res* 1998;8:175-85.
14. Ewing B, Green P. Base-calling of automated sequencer traces using phred. II. Error probabilities. *Genome Res* 1998;8:186-94.
15. Zhang J, Wheeler DA, Yakub I, et al. SNPdetector: a software tool for sensitive and accurate SNP detection. *PLoS Comput Biol* 2005;1:e53.

16. Zhang J, Finney RP, Rowe W, et al. Systematic analysis of genetic alterations in tumors using Cancer Genome WorkBench (CGWB). *Genome Res* 2007;17:1111-7.
17. Zhang J, Rowe WL, Struewing JP, Buetow KH. HapScope: a software system for automated and visual analysis of functionally annotated haplotypes. *Nucleic Acids Res* 2002;30:5213-21.
18. Bamford S, Dawson E, Forbes S, et al. The COSMIC (Catalogue of Somatic Mutations in Cancer) database and website. *Br J Cancer* 2004;91:355-8.
19. Sherry ST, Ward MH, Kholodov M, et al. dbSNP: the NCBI database of genetic variation. *Nucleic Acids Res* 2001;29:308-11.
20. Garvie CW, Hagman J, Wolberger C. Structural studies of Ets-1/Pax5 complex formation on DNA. *Mol Cell* 2001;8:1267-76.
21. Jones TA, Zou JY, Cowan SW, Kjeldgaard M. Improved methods for building protein models in electron density maps and the location of errors in these models. *Acta Crystallogr A* 1991;47(Pt 2):110-9.
22. DeLano WL. The PyMOL Molecular Graphics System. <http://www.pymol.org>. 2002.
23. Bair E, Tibshirani R. Semi-supervised methods to predict patient survival from gene expression data. *PLoS Biol* 2004;2:E108.
24. Bair E, Hasle H, Debashis P, Tibshirani R. Prediction by Supervised Principal Components. *J Am Stat Assoc* 2006;101:119-37.
25. Gray RJ. A class of  $K$ -sample tests for comparing the cumulative incidence of a competing risk. *Annals Statistics* 1988;16:1141-54.
26. Peto R, Pike MC, Armitage P, et al. Design and analysis of randomized clinical trials requiring prolonged observation of each patient. II. analysis and examples. *Br J Cancer* 1977;35:1-39.
27. Mantel N. Evaluation of survival data and two new rank order statistics arising in its consideration. *Cancer Chemother Rep* 1966;50:163-70.
28. Fine JP, Gray RJ. A Proportional Hazards Model for the Subdistribution of a Competing Risk. *J Am Stat Assoc* 1999;94:496-509.
29. R Development Core Team. R: A language and environment for statistical computing. R Foundation for Statistical Computing 2006;Vienna:Austria.
30. Smyth GK. Linear models and empirical bayes methods for assessing differential expression in microarray experiments. *Stat Appl Genet Mol Biol* 2004;3:Article3.
31. Gentleman RC, Carey VJ, Bates DM, et al. Bioconductor: open software development for computational biology and bioinformatics. *Genome Biol* 2004;5:R80.
32. Benjamini Y, Hochberg Y. Controlling the false discovery rate: a practical and powerful approach to multiple testing. *J R Stat Soc B* 1995;57:289-300.
33. Subramanian A, Tamayo P, Mootha VK, et al. Gene set enrichment analysis: a knowledge-based approach for interpreting genome-wide expression profiles. *Proc Natl Acad Sci U S A* 2005;102:15545-50.

34. Efron B, Tibshirani R. On testing the significance of sets of genes. *Ann Appl Stat* 2007;1:107-29.
35. Edgar R, Domrachev M, Lash AE. Gene Expression Omnibus: NCBI gene expression and hybridization array data repository. *Nucleic Acids Res* 2002;30:207-10.
36. Barrett T, Troup DB, Wilhite SE, et al. NCBI GEO: mining tens of millions of expression profiles--database and tools update. *Nucleic Acids Res* 2007;35:D760-5.
37. Georgantas RW, 3rd, Tanadve V, Malehorn M, et al. Microarray and serial analysis of gene expression analyses identify known and novel transcripts overexpressed in hematopoietic stem cells. *Cancer Res* 2004;64:4434-41.
38. Buhl AM, Nemazee D, Cambier JC, Rickert R, Hertz M. B-cell antigen receptor competence regulates B-lymphocyte selection and survival. *Immunol Rev* 2000;176:141-53.
